# Supplementary material
Source: publisher figshare collection journal article supplement (https://gsapubs.figshare.com/ndownloader/files/31694660)
Supplement: Supplementary file 1 [file 31694660]

## Sheet: Experimental runs
Experiment	Sample	P (Kbar)	T (°C)	% CaCO3	Run (h)	EMP	No.	Comment	SiO2	TiO2	Al2O3	FeO	MnO	MgO	CaO	Na2O	K2O	P2O5	Cr2O3	NiO	Total
QP1_123_10	BM1	2	1100	10	1			GLASS
	(SiO2 = 38.52 wt%; CaO = 13.58 wt%)					DST		1-15 glass	38.082	2.406	10.951	8.023	0.202	6.045	22.744	3.241	2.585	1.414			95.693
						DST		glass 1-4	38.98	2.494	10.833	7.609	0.228	6.28	22.525	4.023	2.755	1.192			96.919
						DST		glass 1-5	39.036	2.752	10.824	7.745	0.133	6.007	23.174	3.881	2.441	1.095			97.088
						DST		glass 1-6 glass	39.393	2.517	11.17	6.92	0.17	5.197	23.289	4.44	2.84	1.298			97.234
								average	38.8727	2.54225	10.9445	7.57425	0.18325	5.88225	22.933	3.89625	2.65525	1.24975			96.7335
								standard deviation	0.558002	0.147789	0.161085	0.468964	0.0410477	0.472519	0.359167	0.497096	0.177877	0.137342
QP1_123_10	BM1	2	1100	10	1	DST		CLINOPYROXENE
						DST		Mel 1-1	42.506	2.97	9.36	7.62	0.032	11.255	24.437	0.548	0.247	0.311			99.286
						DST		Mel 1-2	41.696	2.853	9.459	8.947	0.068	11.059	23.984	0.443	0.273	0.43			99.212
						DST		Mel 1-3	40.423	3.14	10.46	9.283	0.036	9.731	24.14	0.68	0.539	0.631			99.063
						DST		Mel 1-8	41.117	2.726	9.882	7.893	0.056	10.717	23.581	1.109	0.771	0.784			98.636
								average	41.4355	2.92225	9.79025	8.43575	0.048	10.6905	24.0355	0.695	0.4575	0.539			99.0492
								standard deviation	0.883257	0.176073	0.500608	0.803997	0.0169706	0.677199	0.356532	0.292537	0.247167	0.210043
QP1_123_30	BM1	2	1100	30	1	DST/INGV		GLASS
						DST		glass 2-6	30.037	0.978	6.43	4.051	0	3.101	30.572	4.145	3.542	2.248			85.104
						DST		glass 2-7	32.462	1.498	7.027	4.533	0.244	2.746	28.498	3.063	3.483	1.608			85.162
								average	31.2495	1.238	6.7285	4.292	0.122	2.9235	29.535	3.604	3.5125	1.928			85.133
								standard deviation	1.71473	0.367696	0.422143	0.340825	0.172534	0.251023	1.46654	0.76509	0.0417193	0.452548
QP1_123_30	BM1	2	1100	30	1	INGV		CALCITE
						INGV		Cc 3	1.2233	0	0.4343	0.452419	0.1095	0.3636	54.61	0.7048	0.7821	1.6743			60.3543
						INGV		Cc 4	3.08	0	0.5103	0.552117	0.0595	0.8561	55.01	0.3797	0.298	0.7096			61.4553
						INGV		Cc 5	2.94	0	0.5998	0.982942	0.0307	1.0585	53.62	0.1391	0.2425	0.2966			59.9101
						INGV		Cc 7	1.8974	0	0.4077	0.666212	0.0672	0.8193	54.66	0.5249	0.7721	1.8607			61.6755
								average	2.28517	0	0.488025	0.663423	0.066725	0.774375	54.475	0.437125	0.523675	1.1353			60.8488
								standard deviation	0.882891	0	0.0862715	0.230225	0.0325573	0.293349	0.597132	0.239075	0.293534	0.753075
QP1_123_30	BM1	2	1100	30	1	DST		PEROVSKITE
						DST		Pvsk ? 2-15	24.147	0.868	11.014	17.462	0.036	12.515	24.455	0	0	0			90.497
QP1_123_30	BM1	2	1100	30	1	INGV		CLINOPYROXENE
						INGV		Px 2	37.46	8.51	9.54	8.28716	0.2289	9.47	23.16	1.0522	0.5244	0.7529			98.9856
						INGV		Px 4	38.79	3.98	10.61	8.18818	0.1061	9.67	25.36	0.5892	0.7294	0.5888			98.6117
								average	38.125	6.245	10.075	8.23767	0.1675	9.57	24.26	0.8207	0.6269	0.67085			98.7986
								standard deviation	0.940452	3.20319	0.756604	0.069988	0.0868327	0.141421	1.55563	0.32739	0.144957	0.116036
QP1_123_30	BM1	2	1100	30	1	DST/INGV		MELILITE
						INGV		Mel 1	42.46	0.725	7.89	3.36	0.1255	7.86	34.16	2.84	0.2638	0.252			99.9363
						DST		Mel 2-1	42.542	0.016	5.359	1.82	0.039	10.628	38.192	1.877	0.291	0.074			100.838
						DST		big pecilitic Mel2-14	41.818	0.187	7.843	2.219	0.052	8.844	37.057	2.605	0.234	0.088			100.947
								average	42.2733	0.309333	7.03067	2.46633	0.0721667	9.11067	36.4697	2.44067	0.262933	0.138			100.574
								standard deviation	0.396456	0.369992	1.4479	0.799237	0.0466431	1.40314	2.07918	0.502092	0.0285099	0.0989747
QP1_123_50	BM1	2	1100	50	1	INGV		GLASS
						INGV		glass 6	29.49	1.2294	3.98	2.05154	0.1378	4.57	40.4	3.36	2.08	0.7328			88.0315
QP1_123_50	BM1	2	1100	50	1	INGV		CALCITE
						INGV		Cc 2	1.2395	0	0.1011	0.565614	0.0605	0.835	55.1	0.3412	0.432	1.7697			60.4446
						INGV		Cc 3	1.738	0	0.177	0.471405	0.1473	0.9896	53.69	0.2337	0.533	0.6359			58.6159
						INGV		Cc 4	0.3691	0	0.0107	0.412468	0.0998	0.8905	51.69	0.2147	0.5609	0.5849			54.8331
						INGV		Cc 9	1.7914	0	0.1433	0.402661	0.055	0.4717	53.98	1.1841	0.4711	0.12			58.6193
								average	1.2845	0	0.108025	0.463037	0.09065	0.7967	53.615	0.493425	0.49925	0.777625			58.1282
								standard deviation	0.658937	0	0.0719305	0.0748212	0.0427118	0.225906	1.42006	0.463806	0.0584659	0.700931
QP1_125_10	BM1	2	1200	10	6	DST		GLASS
						DST		QP125_10 glass 1	36.996	2.984	9.453	8.57	0.142	10.582	20.546	2.837	1.825	1.135			95.07
						DST		QP125_10 glass 2	37.149	2.928	9.628	8.862	0.066	10.7	20.126	2.809	1.819	1.265			95.352
						DST		QP125_10 glass 3	37.178	2.925	9.575	8.737	0.235	10.866	20.151	2.932	1.765	1.293			95.657
						DST		QP125_10 glass 4	37.252	2.972	9.629	8.831	0.186	10.875	20.268	2.867	1.847	1.328			96.055
						DST		QP125_10 glass 5	37.195	2.779	9.627	8.877	0.108	11.086	19.95	2.886	1.828	1.296			95.632
						DST		QP125_10 glass 6	37.352	2.947	9.784	8.922	0.142	10.667	20.394	2.792	1.79	1.189			95.979
						DST		QP125_10 glass 7	37.178	2.847	9.816	8.406	0.154	11.422	19.925	2.832	1.814	1.188			95.582
						DST		glass 1-1	37.323	2.567	9.773	8.838	0.132	10.198	20.411	3.01	1.928	0.96			95.14
						DST		glass 1-2	37.271	2.34	9.802	9.069	0.188	10.631	20.348	3.034	1.809	1.022			95.514
						DST		glass 1-3	37.025	2.725	9.731	8.694	0.193	11.352	20.028	2.985	1.764	0.916			95.413
						DST		glass 1-4	37.222	2.471	9.808	9.021	0.171	11.326	20.088	3.008	1.835	0.865			95.815
								average	37.1946	2.77136	9.69327	8.80245	0.156091	10.8823	20.2032	2.90836	1.82036	1.13245			95.5645
								standard deviation	0.110445	0.221459	0.118558	0.192753	0.0459727	0.38102	0.204064	0.0888946	0.0446369	0.165814
QP1_125_10	BM1	2	1200	10	6	DST		OLIVINE
						DST		Ol gm 1-5	42.002			4.195	0.171	52.017	1.056					0.081	99.522
						DST		Ol gm 1-7	41.746			4.276	0.185	52.892	1.084					0.154	100.337
						DST		Ol gm 1-9	41.306			4.262	0.189	52.422	1.121					0.062	99.362
						DST		Ol gm 1-11	40.694			4.745	0.207	52.134	1.062					0.104	98.946
								average	41.437			4.3695	0.188	52.3663	1.08075					0.10025	99.5418
								standard deviation	0.572688			0.252817	0.0148324	0.389631	0.0294095					0.0397356
QP1_125_30	BM1	2	1200	30	6	DST		GLASS
						DST		QP125_30 glass 1	33.035	2.355	8.003	6.915	0.147	11.302	26.482	2.479	1.505	1.011			93.234
						DST		QP125_30 glass 2	33.162	2.379	7.828	7.034	0.16	11.095	26.529	2.442	1.533	1.071			93.233
						DST		QP125_30 glass 3	33.231	2.439	7.809	6.885	0.13	11.121	26.727	2.412	1.555	1.04			93.349
						DST		QP125_30 glass 4	33.42	2.444	7.809	6.935	0.13	11.268	26.48	2.423	1.601	1.003			93.513
						DST		QP125_30 glass 5	33.095	2.549	8.015	6.827	0.14	11.325	26.387	2.431	1.498	1.025			93.292
						DST		QP125_30 glass 6	33.478	2.532	7.855	6.842	0.15	11.327	26.334	2.367	1.605	1.011			93.501
						DST		QP125_30 glass 7	33.192	2.493	7.897	6.779	0.174	11.168	26.424	2.289	1.559	1.016			92.991
						DST		glass 1-1	32.945	2.306	7.921	6.994	0.117	11.641	26.764	2.407	1.557	0.877			93.529
						DST		glass 1-4	33.303	2.396	7.876	6.965	0.119	11.734	26.901	2.504	1.55	0.803			94.151
								average	33.2068	2.43256	7.89033	6.90844	0.140778	11.3312	26.5587	2.41711	1.55144	0.984111			93.4214
								standard deviation	0.17379	0.0817849	0.07729	0.0832047	0.0189392	0.220719	0.193234	0.0625289	0.0367087	0.0861966
QP1_122_30	BM1	2	1200	30	1	INGV		SPINEL
						INGV		Sp 13	0	1.72	41.03	22.52	0.1364	22.37					2.2	0.1983	90.1747
						INGV		Sp 15	0	2.08	39.36	24.24	0.1912	22.89					1.4107	0.2293	90.4012
						INGV		Sp 16	0	1.338	44.6	23.64	0.1336	22.71					1.58	0.1764	94.178
						INGV		Sp 14	0	1.73	43.02	25.58	0.0608	23.05					2.3	0.2072	95.948
								average	0	1.717	42.0025	23.995	0.1305	22.755					1.87268	0.2028	92.6755
								standard deviation	0	0.303089	2.28844	1.27461	0.0535008	0.291833					0.44303	0.0218999
QP1_125_30	BM1	2	1200	30	6	DST		OLIVINE
						DST		Ol gm 1-5	41.715			4.086	0.216	52.403	1.611					0.098	100.129
						DST		Ol gm 1-6	41.251			4.071	0.227	52.682	1.641					0.096	99.968
						DST		Ol gm 1-7	41.695			4.242	0.188	52.366	1.676					0.088	100.255
								average	41.5537			4.133	0.210333	52.4837	1.64267					0.094	100.117
								standard deviation	0.262308			0.0946942	0.020108	0.172755	0.032532					0.0052915
QP1_125_50	BM1	2	1200	50	6	DST		GLASS
						DST		QP125_50 glass 1	29.472	2.112	5.909	5.498	0.116	10.41	31.313	2.076	1.306	0.916			89.128
						DST		QP125_50 glass 2	29.2	2.219	5.987	5.399	0.121	10.225	31.75	2.194	1.35	0.937			89.382
						DST		QP125_50 glass 4	29.105	2.241	5.947	5.369	0.153	10.044	31.293	2.181	1.376	1.007			88.716
						DST		QP125_50 glass 5	29.325	2.262	5.906	5.346	0.197	10.209	30.984	2.184	1.356	1.054			88.823
						DST		QP125_50 glass 6	29.28	2.166	5.865	5.467	0.064	10.081	31.52	2.163	1.364	0.969			88.939
						DST		QP125_50 glass 8	29.252	2.077	5.815	5.372	0.076	10.127	30.81	2.214	1.336	0.919			87.998
						DST		glass 1-1	29.169	1.998	5.952	5.726	0.144	11.038	31.303	2.201	1.373	0.733			89.637
						DST		glass 1-2	29.569	2.101	5.999	5.593	0.158	11	31.446	2.239	1.373	0.659			90.137
						DST		glass 1-3	29.326	2.314	5.95	5.514	0.149	10.831	31.301	2.227	1.367	0.824			89.803
						DST		glass 1-4	29.708	2.034	5.787	5.477	0.112	10.596	31.53	2.189	1.419	0.881			89.733
								average	29.3406	2.1524	5.9117	5.4761	0.129	10.4561	31.325	2.1868	1.362	0.8899			89.2296
								standard deviation	0.18889	0.10457	0.0705141	0.117044	0.039752	0.384416	0.270606	0.0449983	0.0292651	0.121563
QP1_125_50	BM1	2	1200	50	6	DST		OLIVINE
						DST		Ol gm 1-6	40.827			4.088	0.189	51.89	1.945					0.079	99.018
						DST		Ol gm 1-7	40.717			4.01	0.216	51.765	1.958					0.038	98.704
								average	40.772			4.049	0.2025	51.8275	1.9515					0.0585	98.861
								standard deviation	0.0777817			0.0551543	0.0190919	0.0883883	0.00919239					0.0289914
QP1_122_50	BM1	2	1200	50	1	INGV		CLINOPYROXENE
						INGV		Px 2	36.55	3.72	10.62	13.695	0	13.58	18.17	0.7488	0.4003	0.8901	0.0152	0.0769	98.4663
						INGV		Px 5	38.26	3.54	10.1	12.0573	0.0266	10.55	21.05	0.5291	0.1874	1.2109	0.012	0.0586	97.5819
						INGV		Px 6	38.06	2.76	9.84	10.5187	0.1853	12.51	20.5	1.1677	0.9988	1.2597	0	0.0589	97.8591
						INGV		Px 8	39.96	2.71	9.8	9.24095	0.1281	11.66	19.81	1.65	1.42	1.2973	0.0317	0.0629	97.7709
								average	38.2075	3.1825	10.09	11.378	0.085	12.075	19.8825	1.0239	0.751625	1.1645	0.014725	0.064325	97.9195
								standard deviation	1.3956	0.522327	0.377536	1.92659	0.086705	1.2848	1.2493	0.494364	0.562613	0.186322	0.0130719	0.00860944
QP1_124_10	BM1	2	1300	10	1	DST		GLASS
						DST		QP124_10 glass 2	37.394	2.679	8.798	9.07	0.152	13.332	18.477	2.617	1.674	1.111			95.304
						DST		QP124_10 glass 5	37.417	2.856	9.011	9.749	0.103	14.523	18.108	2.404	1.523	1.048			96.742
						DST		QP124_10 glass 6	37.728	2.596	8.949	9.164	0.14	14.094	18.659	2.576	1.597	1.138			96.641
						DST		QP124_10 glass 7	37.453	2.637	8.69	9.232	0.144	13.888	18.636	2.616	1.618	1.123			96.037
						DST		QP124_10 glass 8	37.296	2.522	8.944	9.458	0.174	14.115	18.62	2.507	1.641	1.224			96.501
						DST		QP124_10 glass 9	37.42	2.633	9.141	8.945	0.176	13.074	19.018	2.699	1.775	1.113			95.994
						DST		QP124_10 glass 10	37.609	2.549	8.86	9.069	0.137	14.326	18.511	2.535	1.703	0.955			96.254
						DST		QP124_10 glass 11	37.632	2.553	8.896	8.91	0.189	14.547	18.706	2.648	1.644	1.132			96.857
						DST		glass 1-1	37.25	2.236	9.059	9.034	0.185	14.965	18.495	2.634	1.671	1.002			96.531
						DST		glass 1-2	37.49	2.492	8.998	9.382	0.165	14.998	18.561	2.554	1.626	0.872			97.138
						DST		glass 1-3	37.018	2.427	9.047	9.622	0.07	14.834	18.661	2.762	1.67	0.88			96.991
						DST		glass 1-4	37.188	2.311	9.165	9.589	0.184	13.444	19.258	2.852	1.652	0.903			96.546
						DST		glass 1-5	37.25	2.668	8.849	9.632	0.17	15.23	18.241	2.628	1.607	0.914			97.189
								average	37.3958	2.55069	8.95438	9.29662	0.153	14.2592	18.6116	2.61785	1.64623	1.03192			96.5173
								standard deviation	0.196463	0.162217	0.135932	0.289947	0.0348569	0.68243	0.293344	0.11335	0.0592834	0.117451
QP1_124_10	BM1	2	1300	10	1	DST/INGV		OLIVINE
						DST		Ol Skeletal 1-6	41.03			4.122	0.262	52.027	1.61					0.161	99.212
						DST		Ol skeletal 1-8	40.939			3.963	0.203	52.857	1.296					0.165	99.423
						INGV		Ol 15	42.98		0.31	3.86014	0	49.84	1.48					0.6	99.0701
						INGV		Ol 17	42.89		0.7	3.63519	0.12	49.88	1.56					0	98.7852
								average	41.9597		0.505	4.508	0.14625	51.151	1.4865					0.2315	99.988
								standard deviation	1.12733		0.275772	0.204017	0.113573	1.52883	0.137825					0.257408
QP1_124_10	BM1	2	1300	10	1	INGV		SPINEL
						INGV		Sp 18	0	3.31	20.43	49.88	0	21.63					2.47	0.57	98.29
						INGV		Sp 19	0	3.48	19.03	52.89	0	21.49					1.79	0.05	98.73
						INGV		Sp 20	0	3.78	20.42	50.8	0	21.8					1.46	0.34	98.6
						INGV		Sp 21	0	3.38	20.88	49.83	0	21.39					3.19	0.45	99.12
						INGV		Sp 25	0	3.57	20.44	49.86	0	21.78					3.02	0.31	98.98
						INGV		Sp 29	0	4.45	19.17	52.29	0	21.84					1.13	0	98.88
						INGV		Sp 28	0	3.8	18.29	53.23	0	21.89					0.87	0.2	98.28
								average	0	3.68143	19.8086	51.2543	0	21.6886					1.99	0.274286	98.6971
								standard deviation	0	0.386498	0.968391	1.51214	0	0.189862					0.917079	0.206144
QP1_124_10	BM1	2	1300	10	1	INGV-SEM		CLINOPYROXENE
						INGV-SEM		Px 3	37.72	2.83	9.17	8.65608	0.36	15.45	19.41	2.31	1.73	1.13	0.27	0	99.0361
						INGV-SEM		Px 4	37.93	2.97	10.18	8.31415	0.2	15.06	19.05	2.24	1.73	1.02	0.34	0	99.0342
						INGV-SEM		Px 5	37.41	3.39	9.55	8.75505	0.15	14.93	19.51	2.27	1.71	1.22	0.14	0	99.0351
						INGV-SEM		Px 7	37.51	3.3	9.2	8.40413	0	15.48	19.92	2.41	1.56	1.22	0.05	0	99.0541
						INGV-SEM		Px 8	38.05	3.33	9.75	8.64708	0.18	14.39	19.38	2.13	1.86	1.1	0.17	0	98.9871
						INGV-SEM		Px 10	38.67	2.15	9.72	7.95423	0.38	13.74	20.39	2.58	2.06	1.22	0.16	0.11	99.1342
						INGV-SEM		Px 11	37.2	3.78	10.56	8.35014	0	13.25	20.47	2.78	1.73	0.78	0.17	0	99.0701
						INGV-SEM		Px 24	39.82	3.34	9.38	8.33215	0.16	12.48	23.68	0.29	0.06	0.92	0.33	0.28	99.0721
								average	38.0388	3.13625	9.68875	8.42663	0.17875	14.3475	20.2263	2.12625	1.555	1.07625	0.20375	0.04875	99.0529
								standard deviation	0.850486	0.489721	0.48221	0.256404	0.140858	1.09596	1.48263	0.770249	0.620944	0.160707	0.100561	0.101057
QP1_124_30	BM1	2	1300	30	1	DST		GLASS
						DST		QP124_30 glass 1	33.266	2.356	7.833	7.627	0.184	12.76	25.808	2.347	1.422	1.027			94.63
						DST		QP124_30 glass 2	32.849	2.343	7.822	7.662	0.118	12.766	25.885	2.354	1.468	1.15			94.417
						DST		QP124_30 glass 3	33.726	2.325	7.716	7.908	0.105	12.826	25.688	2.456	1.405	1.089			95.244
						DST		QP124_30 glass 4	33.528	2.517	7.767	7.805	0.172	12.671	25.718	2.342	1.451	1.068			95.039
						DST		QP124_30 glass 5	33.513	2.337	7.654	7.707	0.128	12.597	25.913	2.296	1.451	0.961			94.557
						DST		QP124_30 glass 6	33.125	2.232	7.751	7.408	0.142	12.76	25.885	2.395	1.425	1.063			94.186
						DST		QP124_30 glass 8	33.69	2.35	7.579	7.246	0.145	12.085	26.231	2.475	1.507	1.043			94.351
						DST		QP124_30 glass 9	33.429	2.29	7.506	7.074	0.054	12.006	26.196	2.44	1.471	1.032			93.498
						DST		QP124_30 glass 10	33.018	2.247	7.532	7.317	0.155	12.468	25.965	2.418	1.469	1.004			93.593
						DST		QP124_30 glass 12	33.045	2.199	7.886	7.575	0.155	12.463	25.703	2.458	1.509	1.016			94.009
						DST		glass 1-1	33.362	2.181	7.661	7.6	0.088	12.712	25.869	2.525	1.472	0.906			94.376
						DST		glass 1-2	32.941	2.151	7.748	7.833	0.102	13.208	25.977	2.35	1.518	0.804			94.632
						DST		glass 1-3	32.585	2.215	7.766	7.956	0.153	13.276	25.605	2.414	1.489	0.864			94.323
						DST		glass 1-4	33.552	2.169	7.676	7.707	0.211	12.833	25.836	2.455	1.538	0.952			94.929
								average	33.2592	2.27943	7.70693	7.60179	0.136571	12.6736	25.8771	2.40893	1.47107	0.9985			94.4131
								standard deviation	0.340979	0.0996631	0.112734	0.257937	0.0410267	0.351555	0.179318	0.0640966	0.0386791	0.0929969
QP1_124_30	BM1	2	1300	30	1	DST/INGV		OLIVINE
						DST		Ol gm 1-5	41.676			3.014	0.119	52.853	2.031					0.146	99.839
						INGV		Ol 12	43.8		0.72	2.60942	0	49.65	2.43					0.05	99.2594
						INGV		Ol 13	42.89		0.86	2.32148	0.28	50.58	2.78					0	99.7115
						INGV		Ol 14	42.92		0.79	2.86136	0	50.26	2.49					0.12	99.4414
						INGV		Ol 15	43.44		0.69	3.17629	0.14	49.34	2.45					0.15	99.3863
						INGV		Ol 16	43.41		0.48	2.39347	0.17	50.72	1.8					0.34	99.3135
								average	43.0227		0.708	2.72934	0.118167	50.5672	2.33017					0.134333	99.6098
								standard deviation	0.744324		0.143422	0.344025	0.107033	1.24016	0.352931					0.116656
QP1_124_30	BM1	2	1300	30	1	INGV		SPINEL
						INGV		Sp 7	0	2.01	30.72	38.46		22.7					2.73	0	96.62
						INGV		Sp 8	0	1.66	31.25	38.97		23.04					4.02	0.12	99.06
						INGV		Sp 9	0	1.79	31.41	38.48		23.08					3.88	0.21	98.85
						INGV		Sp 10	0	2.38	29.24	41.46		21.83					3.1	0.68	98.69
						INGV		Sp 11	0	2.12	27.5	38.71		21.12					0.73	0.13	90.31
						INGV		Sp 17	0	2.14	31.87	41.04		22.85					0.79	0.33	99.02
						INGV		Sp 18	0	2.82	28.54	42.8		21.73					2.48	0.09	98.46
						INGV		Sp 19	0	3.52	22.75	49.43		22.36					0.59	0.3	98.95
						INGV		Sp 20	0	2.24	31.1	42.59		22.95					0.27	0.22	99.37
								average	0	2.29778	29.3756	41.3267		22.4067					2.06556	0.231111	97.7033
								standard deviation	0	0.567952	2.88938	3.50451		0.696455					1.48355	0.197639
QP1_124_30	BM1	2	1300	30	1	INGV-SEM		CLINOPYROXENE
						INGV-SEM		Px 1	35.57	2.78	7.7	6.60453	0	13.08	28.21	2.09	1.46	1	0.59	0.11	99.1945
						INGV-SEM		Px 2	35.59	2.6	8.38	7.2074	0	13.02	27.87	2.26	1.56	0.7	0	0	99.1874
						INGV-SEM		Px 3	35.24	2.27	7.64	7.75628	0.29	12.59	27.76	2.15	1.83	1.33	0	0.27	99.1263
						INGV-SEM		Px 4	36.55	1.89	8.14	7.12642	0	12.89	28.06	2	1.25	0.87	0.17	0.26	99.2064
						INGV-SEM		Px 5	35.01	2.6	8.35	7.73828	0	12.58	27.62	2.51	1.67	1.07	0	0	99.1483
						INGV-SEM		Px 6	34.17	3.01	8.21	7.42335	0.5	13.3	27.43	2.29	1.61	1.16	0	0.01	99.1134
						INGV-SEM		Px 21	35.68	2.21	8.97	7.16241	0.04	13.02	26.33	2.39	1.78	0.92	0.17	0.43	99.1024
						INGV-SEM		Px 22	35.57	2.6	8.72	8.44012	0	12.25	26.59	2.71	1.41	0.77	0	0	99.0601
						INGV-SEM		Px 23	35.65	2.38	8.61	7.36936	0.23	12.47	26.96	2.68	1.79	0.97	0	0.04	99.1494
						INGV-SEM		Px 25	35.06	2.7	8.16	7.23439	0	12.29	28.39	2.46	1.76	0.68	0	0.41	99.1444
								average	35.409	2.504	8.288	7.40625	0.106	12.749	27.522	2.354	1.612	0.947	0.093	0.153	99.1433
								standard deviation	0.611255	0.321773	0.418696	0.489093	0.175195	0.360754	0.692609	0.240241	0.19159	0.205699	0.188388	0.174232
QP1_124_50	BM1	2	1300	50	1	DST		GLASS
						DST		QP124_50 glass 1	30.288	2.083	6.527	5.614	0.17	11.038	30.692	2.085	1.366	0.898			90.761
						DST		QP124_50 glass 2	30.162	2.073	6.754	6.334	0.069	11.416	30.425	2.138	1.243	1.018			91.632
						DST		QP124_50 glass 3	29.661	1.965	6.712	6.115	0.091	11.454	30.406	2.112	1.218	0.899			90.633
						DST		QP124_50 glass 4	29.825	1.944	6.905	6.29	0.123	11.419	30.583	1.998	1.246	0.89			91.223
						DST		QP124_50 glass 5	29.288	1.962	6.941	6.536	0.133	11.379	30.397	2.046	1.354	0.903			90.939
						DST		QP124_50 glass 6	30.027	2.002	7.016	6.548	0.155	11.599	30.553	2.081	1.252	0.879			92.112
						DST		QP124_50 glass 7	29.232	2.067	6.958	6.389	0.13	11.472	30.444	2.046	1.28	0.971			90.989
						DST		QP124_50 glass 8	29.787	1.997	6.973	6.483	0.174	11.42	30.611	2.154	1.346	0.925			91.87
						DST		QP124_50 glass 9	29.773	2.079	6.995	6.436	0.133	11.272	30.393	2.055	1.344	1.015			91.495
						DST		QP124_50 glass 10	29.511	1.933	7.079	6.399	0.13	11.368	30.261	2.181	1.313	1.026			91.201
						DST		QP124_50 glass 11	29.438	1.945	6.962	6.756	0.147	11.804	30.6	2.083	1.295	0.865			91.895
						DST		QP124_50 glass 12	29.067	2.011	7.173	6.732	0.14	11.705	30.41	2.094	1.281	0.838			91.451
						DST		QP124_50 glass 13	30.262	2.19	6.913	6.678	0.133	11.522	30.465	2.139	1.26	0.945			92.507
						DST		glass 1-4	30.196	2.015	6.608	5.954	0.156	11.624	30.586	2.167	1.314	0.76			91.38
						DST		glass 1-5	29.593	1.851	6.699	6.528	0.19	11.986	30.624	2.104	1.362	0.729			91.666
						DST		glass 1-6	29.719	1.859	6.907	6.578	0.139	11.689	30.584	2.179	1.334	0.779			91.767
						DST		glass 1-7	30.355	2.023	6.879	6.699	0.124	12.037	30.73	2.184	1.316	0.761			93.108
								average	29.7755	1.99994	6.88241	6.41582	0.137471	11.5414	30.5155	2.10859	1.30141	0.888294			91.5664
								standard deviation	0.394944	0.0849032	0.169586	0.296917	0.0288447	0.251451	0.1259	0.0549466	0.0464288	0.0924708
QP1_124_50	BM1	2	1300	50	1	INGV		SPINEL
						INGV		Sp 19	0	4.34	27.31	42.08		23.37					1.16		98.26
						INGV		Sp 20	0	1.29	39.57	30.56		23.81					3.99		99.22
						INGV		Sp 21	0	1.38	38.08	30.94		24.16					3.9	0.54	99
						INGV		Sp 22	0	3.4	30.29	38.74		23.59					2.06	0.26	98.34
						INGV		Sp 23	0	3.89	27.01	41.99		22.89					2.48	0.54	98.8
								average	0	2.86	32.452	36.862		23.564					2.718	0.446667	98.9027
								standard deviation	0	1.43162	5.9806	5.74099		0.476529					1.21779	0.161658
QP1_124_50	BM1	2	1300	50	1	INGV-SEM		MELILITE
						INGV-SEM		Mel1	31.8	2.19	7.19	6.37958	0	12.19	34.13	2.07	1.34	1.35	0.09	0.56	99.2896
						INGV-SEM		Mel2	30.97	2.16	7.29	5.97467	0	12	35.61	2.14	1.74	1.15	0.18	0.11	99.3247
						INGV-SEM		Mel3	31.37	2.54	7.39	6.83848	0	12.71	34.43	1.88	1.49	0.6	0	0	99.2485
						INGV-SEM		Mel4	30.71	2.23	7.75	6.68551	0.24	12.41	34.72	1.92	1.44	0.9	0.25	0	99.2555
						INGV-SEM		Mel5	32	2.13	7.47	6.52355	0	12.25	34.42	1.95	1.54	1	0	0	99.2836
						INGV-SEM		Mel6	31.53	2.6	7.53	6.77549	0	11.94	34.14	2.1	1.42	0.96	0.28	0	99.2755
						INGV-SEM		Mel7	30.85	2.15	7.84	6.71251	0	11.69	35.11	2	1.48	0.95	0.47	0	99.2525
						INGV-SEM		Mel8	32.05	2.48	7.5	7.54032	0.2	11.51	33.2	2.09	1.63	0.97	0	0	99.1703
						INGV-SEM		Mel9	32.33	2.41	7.17	6.08265	0	12.04	34.92	1.85	1.44	0.69	0	0.4	99.3326
						INGV-SEM		Mel10	32.01	2.35	7.94	6.50555	0	12.77	32.88	2.16	1.65	0.93	0	0	99.1956
						INGV-SEM		Mel11	31.78	2.98	8.05	6.04666	0	12.05	33.75	2.1	1.4	0.94	0.17	0.06	99.3267
						INGV-SEM		Mel12	31.59	2.52	8.11	5.81271	0.12	12.34	33.73	2.13	1.64	1.01	0.35	0	99.3527
						INGV-SEM		Mel13	31.48	2.62	7.14	6.37958	0.27	12.6	34	2.04	1.54	0.95	0	0.27	99.2896
						INGV-SEM		Mel14	32.29	2.34	6.96	5.92968	0	12.14	34.12	2.26	1.86	1.18	0	0.24	99.3197
						INGV-SEM		Mel15	32.6	2.62	7.22	6.07365	0.16	12.08	33.97	2.14	1.39	0.74	0.18	0.14	99.3136
						INGV-SEM		Mel16	33.42	2.57	7.09	6.01066	0	12.04	33.97	2.13	1.29	0.8	0	0	99.3207
						INGV-SEM		Mel17	32.19	2.37	7.36	6.20862	0.3	12.36	33.69	2.36	1.33	1.1	0	0	99.2686
						INGV-SEM		Mel18	32.65	2.18	7.24	6.44257	0.2	12.43	33.26	2.12	1.31	1.19	0.25	0	99.2726
								average	31.8678	2.41333	7.45778	6.38458	0.0827778	12.1972	34.1139	2.08	1.49611	0.967222	0.123333	0.0988889	99.2829
								standard deviation	0.682043	0.225023	0.34574	0.427362	0.113023	0.327662	0.687837	0.127279	0.157186	0.186919	0.148483	0.165099
RM39_10	BM2	2	1100	10	6			MELILITE
	(SiO2 = 30.29wt%; CaO = 21.96 wt%)					INGV	224	RM39_10_ cx dark 3	41.91	0.2146	4.21	2.62	0.0265	12.06	38.44	0.9871	0.2235	0.1349	0.0019	0	100.829
						INGV	230	RM39_10_ cx dark 9	38.07	0.4837	4.68	2.03	0.0696	11.87	36.46	1.43	0.7258	2.25	0	0.021	98.0901
						INGV	233	RM39_10_ cx dark 12	39.37	0.3924	4.67	2.94	0.1034	11.55	34.72	1.46	0.4875	2.66	0.0783	0	98.4316
								average	39.7833	0.363567	4.52	2.53	0.0665	11.8267	36.54	1.29237	0.478933	1.68163	0.0267333	0.007	99.1167
								standard dev	1.95308	0.136847	0.268514	0.461628	0.0385436	0.257747	1.86129	0.264794	0.25126	1.35511	0.0446681	0.0121244
RM41_10	BM2	2	1200	10	6			GLASS
						DST	11	RM41_10 Glass 1	31.626	2.43	6.496	6.119	0.182	10.45	30.128	1.283	0.845	2.041			91.6
						DST	12	RM41_10 Glass 2	30.629	2.514	6.421	6.419	0.187	10.68	30.316	1.276	0.734	2.164			91.34
						DST	13	RM41_10 Glass 3	30.674	2.419	6.65	6.347	0.143	10.858	30.277	1.192	0.793	1.924			91.277
						DST	14	RM41_10 Glass 4	30.293	2.58	6.586	6.718	0.204	11.069	29.785	1.162	0.784	2.005			91.186
						DST	15	RM41_10 Glass 5	30.298	2.554	6.627	6.588	0.241	10.934	30.277	1.242	0.762	1.827			91.35
								average	30.704	2.4994	6.556	6.4382	0.1914	10.7982	30.1566	1.231	0.7836	1.9922			91.3506
								standard dev	0.545519	0.0724072	0.0956582	0.229838	0.0355992	0.240086	0.219832	0.0527541	0.0411862	0.126494
RM40_10	BM2	2	1200	10	1			OLIVINE
						INGV	1	RM40_10_ol 1	41.25	0.0884	0.1975	3.55	0.1828	51.47	2.52	0.0857	0.0093	0.3344	0.0015	0.0586	99.7482
						INGV	2	RM40_10_ol 2	40.15	0.1318	0.1722	3.85	0.2804	50.54	3.55	0.1032	0.0814	0.5706	0	0.0849	99.5145
						INGV	3	RM40_10_ol 3	41.01	0.1328	0.1596	3.24	0.1854	52.23	2.93	0.0965	0.0556	0.4248	0	0.0456	100.51
						INGV	4	RM40_10_ol 4	41.36	0.163	0.3282	3.24	0.1724	51.39	3.37	0.1144	0.0002	0.5666	0.0138	0.0195	100.738
						INGV	5	RM40_10_ol 5	41.17	0.1629	0.0659	3.24	0.2046	50.97	3.02	0.0199	0.008	0.449	0	0.0576	99.3679
						INGV	6	RM40_10_ol 6	40.11	0.1299	0.2024	3.83	0.1632	51.29	3.35	0.1221	0.0139	0.366	0	0.0539	99.6314
						INGV	7	RM40_10_ol 7	41.33	0.1713	0.2651	3.6	0.1731	51.43	2.5	0.0159	0.0166	0.444	0.0299	0.0797	100.056
						INGV	8	RM40_10_ol 8	40.75	0.1073	0.1805	3.89	0.1871	51.87	2.65	0.0829	0.0173	0.4318	0	0.0851	100.252
						INGV	9	RM40_10_ol 9	40.47	0.1354	0.2038	4.18	0.1803	51.32	3.38	0.0889	0.042	0.4348	0	0.044	100.479
						INGV	10	RM40_10_ol 10	40.21	0.1327	0.2326	4.1	0.2238	51.02	3.41	0.027	0.0526	0.4431	0	0.0368	99.8886
								average	40.781	0.13555	0.20078	3.672	0.19531	51.353	3.068	0.07565	0.02969	0.44651	0.00452	0.05657	100.019
								standard dev	0.509083	0.0255222	0.0687382	0.35361	0.0345365	0.469161	0.399494	0.0397589	0.0265659	0.0743262	0.00990172	0.0216211
RM41_10	BM2	2	1200	10	6			OLIVINE
						INGV	181	RM41_10_ol_2	42.19	0.1867	0.3755	4.19	0.1919	51	2.8	0.1538	0.0351	0.1855	0	0.0509	101.359
						INGV	182	RM41_10_ol_3	42.07	0.0817	0.2535	3.73	0.1724	50.19	3.27	0.053	0.0287	0.1889	0.0048	0.0141	100.057
						INGV	183	RM41_10_ol_4	40.79	0.1304	0.0373	4.01	0.1599	51.52	2.32	0.0024	0.044	0.0803	0	0.0442	99.1385
						INGV	185	RM41_10_ol_6	41.34	0.0928	0.0261	4.07	0.2838	51.4	2.55	0	0.0502	0.2651	0	0.0472	100.125
						INGV	186	RM41_10_ol_7	40.72	0.3304	0.3719	4.52	0.2475	50.87	2.88	0.0711	0.0311	0.1884	0.0831	0.0915	100.405
						INGV	188	RM41_10_ol_9	41.63	0.0674	0.1131	4.2	0.2309	50.95	2.45	0.097	0.0369	0.2473	0.0184	0.0194	100.06
						INGV	189	RM41_10_ol_10	41.43	0.0618	0.0587	4.07	0.2259	51.85	2.43	0.1122	0.0629	0.3027	0	0.0557	100.66
						INGV	190	RM41_10_ol_11	41.15	0.0467	0.4177	4.46	0.1867	51.38	2.43	0.1038	0.066	0.1941	0	0.0928	100.528
						INGV	191	RM41_10_ol_12	40.7	0.1387	0.2353	4.02	0.2284	50.18	3.06	0.1368	0.0997	0.6112	0.0163	0.0238	99.4502
								average	41.3356	0.126289	0.2099	4.14111	0.214156	51.0378	2.68778	0.0811222	0.0505111	0.2515	0.0136222	0.0488444	100.198
								stdev	0.556779	0.0884255	0.156205	0.240335	0.0395596	0.573624	0.329916	0.0545248	0.0227231	0.148774	0.0270712	0.0285667
RM40_10	BM2	2	1200	10	1			SPINEL
						INGV	22	RM40_10_spl 2	0.3884	2.16	31.7	34.61	0.2751	22.12	0.6421	0.0138	0.0063	0.2042	6.8	0.1509	99.0708
						INGV	23	RM40_10_spl 3	1.3504	2.89	30.01	40.59	0.2281	21.7	1.2894	0	0.0222	0.1948	0.1653	0.1716	98.6118
						INGV	25	RM40_10_spl 5	1.1812	2.88	29.55	38.58	0.2519	22.4	1.85	0.0922	0.0458	0.2925	0.7455	0.0887	97.9578
						INGV	26	RM40_10_spl 6	1.5058	2.67	31.11	36.84	0.2478	23.14	2.5	0.1008	0.079	0.2415	1.2665	0.0911	99.7925
						INGV	27	RM40_10_spl 7	2.64	2.87	30.49	38.19	0.2104	21.17	1.9	0.1032	0.0316	0.2618	0.7708	0.1865	98.8243
						INGV	28	RM40_10_spl 8	0.5205	3.14	29.28	42.54	0.2411	21.56	0.7414	0.0696	0.0754	0.258	1.4353	0.2343	100.096
						INGV	29	RM40_10_spl 9	0.3416	3.37	26.87	43.97	0.3465	20.75	0.7073	0.0173	0.0568	0.2564	0.598	0.1923	97.4762
								average	1.13256	2.85429	29.8586	39.3314	0.257271	21.8343	1.37574	0.0567	0.0453	0.244171	1.68306	0.159343	98.8327
								standard dev	0.818078	0.379862	1.56738	3.25991	0.0441731	0.797577	0.725559	0.044984	0.0271309	0.0342286	2.29529	0.0537142
RM41_10	BM2	2	1200	10	6			SPINEL
						INGV	197	RM41_10_spl_6	0.2631	2.25	32.76	33.89	0.2261	20.51	0.7035	0.006	0.036	0.0891	3.12	0.0648	93.9186
						INGV	198	RM41_10_spl_7	0.1002	2.04	37.59	32.25	0.2576	22.4	0.4564	0.03	0	0.0451	2.65	0.0798	97.8991
						INGV	199	RM41_10_spl_8	0.2427	1.94	37.86	31.9	0.2265	23.09	0.4816	0	0.0255	0.0488	3.4	0.0628	99.2779
						INGV	201	RM41_10_spl_10	0.3444	1.9	37.42	31.83	0.3384	22.64	0.5914	0.0853	0.0209	0.047	3.09	0.1308	98.4382
						INGV	202	RM41_10_spl_11	0.1447	2.05	31.25	28.67	0.2393	21.93	0.5207	0.0273	0	0.0445	11.25	0.0878	96.2143
						INGV	203	RM41_10_spl_12	0.2444	1.84	37.17	30.93	0.2338	22.75	0.4769	0	0.0149	0.1252	3.76	0.1015	97.6467
								average	0.22325	2.00333	35.675	31.5783	0.253617	22.22	0.538417	0.0247667	0.0162167	0.0666167	4.545	0.0879167	97.2325
								stdev	0.0876383	0.145419	2.89134	1.72282	0.0431143	0.922475	0.0939285	0.0324871	0.0143331	0.0334421	3.30524	0.0255132
RM41_10	BM2	2	1200	10	6			MONTICELLITE
						INGV	204	RM41_10_mtc_1	35.71	0.3605	0.2376	5.37	0.3383	24.06	31.09	0.3136	0.0426	1.6627	0.0398	0.022	99.2471
						INGV	209	RM41_10_mtc_6	35.54	1.3327	2.33	6.28	0.3844	19.75	31.97	0.2321	0.131	1.1239	0.0067	0.0109	99.0917
						INGV	211	RM41_10_mtc_8	35.1	1.5349	0.3606	6.14	0.362	22.68	31.38	0.2388	0.0758	1.6639	0	0.0124	99.5484
								average	35.45	1.07603	0.976067	5.93	0.361567	22.1633	31.48	0.2615	0.0831333	1.4835	0.0155	0.0151	99.2957
								stdev	0.314802	0.627863	1.17415	0.49	0.0230531	2.20096	0.448442	0.0452441	0.0446539	0.311423	0.0213094	0.00602246
RM41_30	BM2	2	1200	30	6			GLASS
						DST	30	RM41_30 Glass 1	21.583	1.658	2.858	3.082	0.165	8.084	38.989	1.621	1.078	2.345			81.463
						DST	31	RM41_30 Glass 2	21.541	1.524	2.466	2.87	0.188	7.958	40.501	1.793	1.133	2.24			82.214
						DST	32	RM41_30 Glass 3	21.512	1.872	3.011	3.433	0.207	8.436	38.268	1.429	0.978	2.096			81.242
						DST	33	RM41_30 Glass 4	22.068	1.529	2.597	2.768	0.218	8.193	39.862	1.481	1.078	2.309			82.103
						DST	34	RM41_30 Glass 5	21.249	1.962	2.819	3.38	0.222	8.557	37.769	1.808	1.556	2.37			81.692
						DST	35	RM41_30 Glass 7	22.228	1.959	3.208	3.62	0.187	8.319	37.915	1.419	0.966	2.084			81.905
						DST	36	RM41_30 Glass 8	21.272	1.852	3.047	3.32	0.148	8.422	37.81	1.786	1.33	2.111			81.098
						DST	37	RM41_30 Glass 9	22.072	1.618	2.603	2.691	0.082	7.75	39.256	1.787	1.057	2.47			81.386
								average	21.6906	1.74675	2.82613	3.1455	0.177125	8.21488	38.7963	1.6405	1.147	2.25313			81.6379
								standard dev	0.380373	0.185023	0.256858	0.342732	0.0460386	0.272394	1.02637	0.174667	0.199968	0.144381
RM40_30	BM2	2	1200	30	1			OLIVINE
						INGV	41	RM40_30_ol 2	41.23	0.1056	0.1945	3.45	0.2341	50.55	5.3	0.0476	0.015	0.0977	0.0312	0.0533	101.309
						INGV	42	RM40_30_ol 3	41.02	0.1623	0.2057	3.76	0.1171	49.72	6.14	0.0556	0.0203	0.1498	0.0212	0.047	101.419
						INGV	44	RM40_30_ol 5	41.14	0.1349	0.2077	3.46	0.1975	50.63	5.09	0.0438	0.0527	0.1134	0.0406	0.0592	101.17
						INGV	45	RM40_30_ol 6	40.67	0.1216	0.137	3.88	0.2461	50.69	4.44	0	0.0082	0.0644	0.0318	0.0971	100.386
						INGV	46	RM40_30_ol 7	40.64	0.132	0.1787	3.62	0.1803	50.33	5.5	0.0202	0.0108	0.1564	0.0788	0.0227	100.87
						INGV	48	RM40_30_ol 9	40.45	0.1094	0.1389	3.46	0.2318	50.48	4.43	0.0168	0.0243	0.0802	0	0.0136	99.435
						INGV	49	RM40_30_ol 10	40.74	0.1075	0.1691	3.64	0.1488	50.93	4.8	0	0.0309	0.0894	0	0	100.656
								average	40.8414	0.124757	0.175943	3.61	0.193671	50.4757	5.1	0.0262857	0.0231714	0.107329	0.0290857	0.0418429	100.749
								standard dev	0.290254	0.0203118	0.0293868	0.166833	0.048144	0.381657	0.613216	0.0228374	0.015194	0.0347411	0.0269879	0.0327297
RM41_30	BM2	2	1200	30	6			OLIVINE
						INGV	213	RM41_30_ol_2	41.39	0.016	0.0955	3.42	0.2091	51.31	2.34	0.1232	0.0556	0.2124	0.022	0.0548	99.2486
						INGV	214	RM41_30_ol_3	41.64	0.0432	0.0688	3.89	0.1842	52.14	2.31	0.0626	0.0314	0.2587	0	0.0386	100.668
						INGV	215	RM41_30_ol_4	40.58	0.0742	0.1412	3.99	0.1821	51.74	2.29	0.0462	0.0246	0.2906	0	0.0286	99.3875
						INGV	216	RM41_30_ol_5	40.91	0.1035	0.013	3.76	0.2021	51.78	2.33	0.1272	0.0383	0.4157	0	0.0545	99.7343
						INGV	217	RM41_30_ol_6	40.78	0.0535	0.0614	3.69	0.2047	51.38	2.34	0.1496	0.1016	0.2783	0	0.0469	99.086
						INGV	219	RM41_30_ol_8	41.8	0.0834	0.0493	4.1	0.2722	52.09	2.03	0.1179	0	0.225	0	0.0852	100.853
						INGV	220	RM41_30_ol_9	41.23	0.0592	0.1373	3.55	0.2994	51.17	2.18	0.0375	0.0445	0.6341	0.0162	0.0689	99.4271
						INGV	221	RM41_30_ol_10	41.57	0.0443	0.0515	3.28	0.2386	52.14	2.46	0.0653	0.0067	0.2246	0	0.0717	100.153
						INGV	222	RM41_30_ol_11	41.64	0.0706	0.0771	3.98	0.1702	51.82	2.01	0.1323	0.0333	0.2848	0	0.0268	100.245
						INGV	223	RM41_30_ol_12	41.93	0.1167	0.0518	3.5	0.2485	51.85	2.46	0.0862	0	0.3164	0	0.053	100.613
						INGV	224	RM41_30_ol_13	41.2	0.0423	0.1356	3.34	0.3386	51.69	2.13	0.0644	0.0211	0.3198	0.0203	0.0139	99.316
						INGV	226	RM41_30_ol_15	41.74	0.0375	0.0569	3.52	0.284	52.16	1.98	0.0089	0.0175	0.3336	0	0.0523	100.191
						INGV	227	RM41_30_ol_16	42.13	0.1079	0.052	3.46	0.1918	52.44	2.64	0.0804	0.0015	0.215	0	0.0306	101.349
						INGV	228	RM41_30_ol_17	41.18	0.1227	0.0926	3.64	0.277	52.3	2.3	0.0707	0.0548	0.253	0	0.076	100.367
						INGV	229	RM41_30_ol_18	41.15	0.0972	0.2498	4.45	0.1697	51.54	2.18	0.0807	0.0035	0.2529	0.0087	0.0154	100.198
						INGV	230	RM41_30_ol_19	41.79	0.0318	0.0762	3.55	0.2009	51.73	2.06	0.1265	0.0642	0.3761	0	0.0208	100.026
						INGV	231	RM41_30_ol_20	41.95	0.0775	0.0422	3.5	0.1937	52.24	2.06	0.0649	0.043	0.1914	0.0064	0.0426	100.412
						INGV	232	RM41_30_ol_21	41.89	0.069	0.02	3.89	0.2437	51.78	2.23	0.0835	0.0493	0.2947	0.0251	0.0783	100.654
						INGV	233	RM41_30_ol_22	41.73	0.0856	0.0758	4.52	0.2922	50.18	2.4	0.0751	0.0419	0.2982	0.0221	0.0154	99.7363
								average	41.4858	0.0703211	0.0814737	3.73842	0.231721	51.7621	2.24895	0.0843737	0.0333053	0.2987	0.00635789	0.0460158	100.088
								stdev	0.432953	0.030477	0.0543687	0.350258	0.0500088	0.516426	0.177761	0.036564	0.026306	0.0993076	0.00950312	0.0228729
RM40_30	BM2	2	1200	30	1			SPINEL
						INGV	61	RM40_30_spl 2	4.78	2.01	36.63	27.14	0.1267	22.14	3.87	0.1297	0.1171	0.216	1.64	0.1761	98.9756
						INGV	62	RM40_30_spl 3	0.1824	1.5435	35.55	26.34	0.2519	24.3	0.3654	0	0.004	0.0125	20.69	0.0982	109.338
						INGV	64	RM40_30_spl 5	3.79	2.08	38.5	27.64	0.1873	23.91	2.82	0.2388	0.0096	0.2047	1.66	0.0706	101.111
						INGV	65	RM40_30_spl 6	0.207	2.54	38.79	33.5	0.2491	23.43	0.5191	0.0784	0.0603	0.0339	1.1559	0.1367	100.7
								average	2.23985	2.04338	37.3675	28.655	0.20375	23.445	1.89363	0.111725	0.04775	0.116775	6.28648	0.1204	102.531
								standard dev	2.39589	0.407826	1.54416	3.27407	0.0593923	0.939947	1.73099	0.100107	0.0527144	0.108502	9.60518	0.0459748
RM41_30	BM2	2	1200	30	6			SPINEL
						INGV	234	RM41_30_spl_1	0.1232	1.4208	45.89	25.39	0.2419	23.34	0.2453	0.0883	0.047	0.151	1.0583	0.0908	98.0866
						INGV	235	RM41_30_spl_2	3.84	2.08	30.61	26.18	0.2207	18.85	8.12	0.3391	0.2212	0.5533	1.311	0.0981	92.4234
						INGV	236	RM41_30_spl_3	2.78	2.52	38.42	29.4	0.2294	22.93	2.41	0.2263	0.1052	0.3618	0.2914	0.0338	99.7079
						INGV	239	RM41_30_spl_6	0.7367	2.88	33.4	37.13	0.3524	21.98	0.9943	0.031	0.0274	0.1949	0.6739	0.1075	98.5081
						INGV	242	RM41_30_spl_9	1.2137	1.92	35.17	31.45	0.2479	20.91	2.29	0.2138	0.1165	1.0606	0.4631	0.0928	95.1484
						INGV	243	RM41_30_spl_10	5.45	3.32	27.63	22.92	0.2114	17.64	11.67	0.3521	0.2533	0.2523	0.4628	0.0519	90.2138
								average	2.35727	2.3568	35.1867	28.745	0.250617	20.9417	4.28827	0.208433	0.128433	0.428983	0.710083	0.07915	95.6814
								stdev	2.0429	0.688714	6.42273	5.09549	0.0516262	2.28301	4.55827	0.129597	0.091344	0.341231	0.395249	0.0292713
RM41_30	BM2	2	1200	30	6			MELILITE
						INGV	245	RM41_30_gray 2	42.22	0.0573	3.12	1.38	0.0216	11.99	38.33	0.7579	0.2647	0.4513	0.0222	0.0348	98.6498
						INGV	246	RM41_30_gray 3	41.93	0.1247	3.32	1.1784	0.0981	11.93	37.57	0.8712	0.3371	0.4967	0.0439	0.0302	97.9303
						INGV	247	RM41_30_gray 4	42.07	0.0828	3.1	1.33	0.046	12.04	38.07	0.7372	0.2166	0.7427	0	0	98.4353
						INGV	256	RM41_30_gray 1	42.13	0.1587	3.41	1.48	0.0454	11.78	36.94	0.8817	0.3735	0.4358	0.0267	0.0005	97.6623
								average	42.0875	0.105875	3.2375	1.3421	0.052775	11.935	37.7275	0.812	0.297975	0.531625	0.0232	0.016375	98.1694
								stdev	0.121758	0.0448585	0.151959	0.125694	0.0322827	0.112694	0.612447	0.0750213	0.0706256	0.14307	0.0180737	0.0187151
RM41_30	BM2	2	1200	30	6			PEROVSKITE
						INGV	254	RM41_30_bright 2	0.1653	52.27	0.5678	2.54	0.0279	0.1068	37.51	0.1072	0.0995	0.2281	0	0	93.6226
RM40_30	BM2	2	1200	30	1			MONTICELLITE
						INGV	50	RM40_30_mtc 1	36.99	0.4043	0.2865	4.7	0.3093	26.73	29.85	0.1154	0.0544	0.5646	0	0.0067	100.011
						INGV	51	RM40_30_mtc 2	36.6	0.3966	0.2038	4.14	0.1923	26.24	31.15	0.0456	0.0154	0.5998	0	0.0381	99.6216
						INGV	55	RM40_30_mtc 6	38.18	0.1787	0.0353	2.95	0.1808	26.69	31.41	0.0281	0.0319	0.2368	0.0467	0.0661	100.034
						INGV	56	RM40_30_mtc 7	37.88	0.143	0.0351	3.26	0.2169	27.85	30.14	0.0371	0.0232	0.2624	0.034	0.0152	99.8969
						INGV	58	RM40_30_mtc 9	35.74	1.0215	0.2691	5.35	0.1798	25.13	30.29	0.0891	0.0208	0.8895	0.0126	0.0228	99.0152
								average	37.078	0.42882	0.16596	4.08	0.21582	26.528	30.568	0.06306	0.02914	0.51062	0.01866	0.02978	99.7159
								standard dev	0.985403	0.352549	0.123284	0.993756	0.0543523	0.981336	0.675218	0.0374784	0.0153241	0.269726	0.0209444	0.0233578
RM41_50	BM2	2	1200	50	6			GLASS
						DST		RM41_50 Glass 1	16.043	1.526	1.634	2.592	0.096	7.091	43.296	1.05	0.813	1.355			75.496
						DST		RM41_50 Glass 2	15.698	1.45	1.641	2.411	0.166	6.952	43.38	1.01	0.733	1.247			74.688
						DST		RM41_50 Glass 3	15.608	1.483	1.661	2.242	0.136	7.112	43.554	1.075	0.864	1.349			75.084
						DST		RM41_50 Glass 4	15.954	1.402	1.698	2.441	0.099	6.956	43.399	1.033	0.782	1.465			75.229
						DST		RM41_50 Glass 5	15.764	1.482	1.646	2.427	0.067	7.043	42.91	1.081	0.796	1.386			74.602
						DST		RM41_50 Glass 6	15.482	1.344	1.555	2.374	0.106	6.691	43.887	1.11	0.849	1.296			74.694
						DST		RM41_50 Glass 7	15.401	1.539	1.546	2.465	0.096	6.75	43.789	0.994	0.78	1.348			74.708
						DST		RM41_50 Glass 8	15.539	1.395	1.662	2.321	0.143	6.84	43.579	0.988	0.81	1.276			74.553
						DST		RM41_50 Glass 9	15.615	1.462	1.673	2.523	0.126	7.061	43.441	1.032	0.82	1.389			75.142
						DST		RM41_50 Glass 10	15.669	1.46	1.674	2.519	0.069	7.049	43.719	1.023	0.836	1.341			75.359
						DST		RM41_50 Glass 11	15.947	1.481	1.632	2.395	0.151	7.003	43.924	1.111	0.835	1.405			75.884
						DST		RM41_50 Glass 13	15.056	1.411	1.433	2.189	0.158	6.614	43.722	1.091	0.855	1.227			73.756
						DST		RM41_50 Glass 14	15.318	1.365	1.612	2.337	0.086	6.762	43.993	1.033	0.775	1.275			74.556
								average	15.6226	1.44615	1.62054	2.40277	0.115308	6.91723	43.5841	1.04854	0.811385	1.33531			74.9039
								standard dev	0.275315	0.0592549	0.0715549	0.112992	0.03343	0.166635	0.301167	0.0416045	0.0375068	0.0683903
RM41_50	BM2	2	1200	50	6			OLIVINE
						INGV	274	RM41_50_ol 4	41.66	0.1191	0.904	4.5	0.2516	50.84	2.21	0.0593	0.0316	0.0286	0	0.0403	100.644
						INGV	277	RM41_50_ol 7	39.69	0.1205	1.3313	5.6	0.2405	49.41	2.27	0.0564	0.0043	0.0155	0	0.0635	98.802
						INGV	278	RM41_50_ol 8	41.67	0.0757	0.0412	4	0.2634	50.96	2.55	0.0795	0	0.0127	0.0041	0.0324	99.689
								average	41.0067	0.1051	0.758833	4.7	0.251833	50.4033	2.34333	0.0650667	0.0119667	0.0189333	0.00136667	0.0454	99.7118
								stdev	1.14028	0.0254708	0.657187	0.818535	0.0114518	0.862342	0.181475	0.0125835	0.0171384	0.00848783	0.00236714	0.0161651
RM40_50	BM2	2	1200	50	1			SPINEL
						INGV	77	RM40_50_spl 2	0.1725	1.98	40.42	31.41	0.1331	24.39	0.6913	0	0.0225	0.1165	0.9144	0.323	100.573
						INGV	78	RM40_50_spl 3	0.154	1.85	31.75	38.2	0.1439	22.86	0.5513	0.0442	0	0.125	3.26	0.0997	99.0381
						INGV	79	RM40_50_spl 4	0.1441	1.029	30.68	18.55	0.3095	24.48	0.8023	0.0326	0	0.0882	28.35	0.1022	104.568
						INGV	80	RM40_50_spl 5	2.89	2.74	39.53	30.55	0.2549	24.02	1.45	0.1224	0.0522	0.1822	0.6995	0.1053	102.597
								average	0.84015	1.89975	35.595	29.6775	0.21035	23.9375	0.873725	0.0498	0.018675	0.127975	8.30598	0.15755	101.694
								standard dev	1.36662	0.700747	5.0894	8.1694	0.0860205	0.745403	0.397673	0.0518909	0.0247391	0.0394247	13.4129	0.110324
RM41_50	BM2	2	1200	50	6			SPINEL
						INGV	262	RM41_50_spl 1	0.2008	1.6187	43.77	28.66	0.1825	22.28	0.6612	0.1382	0.0376	0.0188	0.9411	0.1307	98.6396
						INGV	263	RM41_50_spl 2	0.1424	1.74	44.02	28.48	0.2051	22.97	0.6155	0.0803	0.0069	0.0056	1.47	0.0515	99.7873
						INGV	266	RM41_50_spl 5	0.3367	2.17	41.27	30.25	0.2024	22.13	1.242	0.0015	0.0357	0.0252	0.704	0.092	98.4595
						INGV	268	RM41_50_spl 7	0.2588	1.82	42.21	29.59	0.1817	22.68	0.82	0	0.0291	0.0625	0.9376	0.0497	98.6394
						INGV	269	RM41_50_spl 8	0.2125	1.6064	44.94	28.58	0.1937	22.62	0.7377	0	0.0545	0.0374	0.6301	0.0975	99.7098
								average	0.23024	1.79102	43.242	29.112	0.19308	22.536	0.81528	0.044	0.03276	0.0299	0.93656	0.08428	99.0471
								stdev	0.0725374	0.229591	1.47657	0.776254	0.0108762	0.334111	0.25089	0.0629873	0.0172252	0.0215337	0.328855	0.0341302
RM40_50	BM2	2	1200	50	1			MONTICELLITE
						INGV	84	RM40_50_gray 2	37.38	0.1929	0.0908	3.69	0.219	26.1	31.99	0.0476	0.0276	0.348	0.0256	0.0054	100.117
						INGV	85	RM40_50_gray 3	37.83	0.2554	0.0414	3.48	0.1434	26.33	31.75	0.0763	0.0127	0.3252	0.0375	0.017	100.299
						INGV	86	RM40_50_gray 4	37.38	0.242	0.1641	3.7	0.2462	25.47	32.32	0.0346	0.0031	0.378	0	0	99.938
						INGV	87	RM40_50_gray 5	37.65	0.1884	0.093	3.6	0.1459	24.62	33.29	0.0594	0.0245	0.2365	0.0035	0	99.9112
						INGV	89	RM40_50_gray 7	37.44	0.2141	0.0877	3.45	0.1928	26.39	31.42	0	0.0023	0.2893	0.0416	0.0135	99.5413
						INGV	90	RM40_50_gray 8	36.91	0.2601	0.0834	3.78	0.1847	26.42	32.05	0.0037	0.0507	0.3536	0	0.0828	100.179
						INGV	91	RM40_50_gray 9	37.98	0.2429	0.1432	3.76	0.1685	26.08	31.66	0.0931	0	0.2611	0.0047	0.0525	100.446
								average	37.51	0.227971	0.100514	3.63714	0.185786	25.9157	32.0686	0.0449571	0.0172714	0.3131	0.0161286	0.0244571	100.062
								standard dev	0.351568	0.0294181	0.0407587	0.13124	0.0376158	0.656934	0.612466	0.0349911	0.0183511	0.052209	0.0182829	0.0314257
RM40_50	BM2	2	1200	50	1			CALCITE
						INGV	92	RM40_50_dark 1	0.0447	0.099	0	0.1555	0.0121	0.1556	59.28	0.0257	0.0338	0.0821	0	0.011	59.8995
						INGV	93	RM40_50_dark 2	0.0359	0.03	0.0019	0.0847	0	0.1688	58.1	0.025	0.0372	0.0947	0	0.0062	58.5844
						INGV	94	RM40_50_dark 3	0.004	0.0431	0.0208	0.1642	0.0415	0.1562	57.68	0.0118	0.0326	0.1626	0	0.032	58.3488
						INGV	95	RM40_50_dark 4	0.0881	0.0821	0.0583	0.0536	0.0072	0.1408	57.85	0.0984	0.015	0.1229	0	0	58.5164
						INGV	96	RM40_50_dark 5	0.029	0.034	0	0.0516	0.0465	0.2498	57.16	0.005	0.0298	0.1256	0	0	57.7313
						INGV	97	RM40_50_dark 6	0.013	0.032	0	0.1451	0.0366	0.2108	58.08	0	0.041	0.1314	0.0079	0	58.6978
								average	0.0357833	0.0533667	0.0135	0.109117	0.0239833	0.180333	58.025	0.02765	0.0315667	0.119883	0.00131667	0.0082	58.6297
								standard dev	0.0296372	0.0296345	0.0234164	0.0518976	0.019855	0.0415786	0.704493	0.0361805	0.00899281	0.0284988	0.00322516	0.01249
RM41_50	BM2	2	1200	50	6			CALCITE
						INGV	282	RM41_50_dark 1	0.0521	0.0246	0.0304	0.1633	0	0.3087	57	0.0502	0.0245	0.049	0	0.0054	57.7082
						INGV	283	RM41_50_dark 2	0.2995	0.0728	0.0068	0.1351	0	0.4377	57.58	0.1114	0.0197	0.1018	0	0.0066	58.7714
						INGV	284	RM41_50_dark 3	0.1168	0.0305	0	0.1382	0.0216	0.3175	57.54	0.0193	0.0148	0.1115	0.0055	0.0521	58.3678
						INGV	285	RM41_50_dark 4	0.0111	0.0912	0.0113	0.1655	0.0405	0.2986	57.29	0.0025	0.0328	0.0783	0.041	0.0496	58.1124
						INGV	286	RM41_50_dark 5	0.0403	0.0766	0.0274	0.1609	0.0261	0.252	56.86	0	0.0277	0.0816	0	0	57.5526
								average	0.10396	0.05914	0.01518	0.1526	0.01764	0.3229	57.254	0.03668	0.0239	0.08444	0.0093	0.02274	58.1025
								stdev	0.115937	0.0297176	0.0131974	0.0146918	0.0175512	0.0689694	0.319812	0.0463185	0.00697245	0.0241628	0.0178802	0.0257961
RM41_50	BM2	2	1200	50	6			MELILITE
						INGV	279	RM41_50_gray 1	43	0.0742	2.98	1.33	0.0817	12.32	40.12	0.5661	0.0479	0.0412	0.0121	0	100.573
						INGV	280	RM41_50_gray 2	42.62	0.1151	2.96	1.42	0.0455	12.35	39.68	0.5394	0.0966	0.035	0.0108	0.0107	99.8831
						INGV	281	RM41_50_gray 3	42.73	0.1019	2.93	1.36	0.0069	12.47	39.63	0.5995	0.0431	0.1203	0	0.0204	100.012
								average	42.7833	0.0970667	2.95667	1.37	0.0447	12.38	39.81	0.568333	0.0625333	0.0655	0.00763333	0.0103667	100.156
								stdev	0.195533	0.020874	0.0251661	0.0458258	0.0374064	0.0793725	0.269629	0.0301122	0.0296001	0.0475593	0.00664254	0.0102041
RM37_10	BM2	2	1300	10	1			GLASS
						DST	187	RM37_10 Glass 1	29.787	2.102	5.923	7.652	0.187	13.736	29.594	1.01	0.751	1.495			92.237
						DST	188	RM37_10 Glass 2	29.883	2.224	5.971	7.884	0.164	13.618	29.994	1.021	0.692	1.591			93.042
						DST	189	RM37_10 Glass 3	30.192	2.234	6.107	7.652	0.182	14.229	28.886	1.027	0.661	1.7			92.87
						DST	190	RM37_10 Glass 4	30.722	2.094	6.128	7.614	0.245	14.788	28.898	0.97	0.676	1.541			93.676
						DST	192	RM37_10 Glass 6	31.006	2.197	6.419	7.879	0.157	15.005	28.526	0.979	0.651	1.555			94.374
						DST	193	RM37_10 Glass 7	29.585	2.155	6.232	7.865	0.243	15.529	28.511	1.015	0.673	1.451			93.259
						DST	194	RM37_10 Glass 8	29.713	2.204	5.897	7.427	0.152	13.838	29.889	1.019	0.705	1.654			92.498
								average	30.1269	2.17286	6.09671	7.71043	0.19	14.3919	29.1854	1.00586	0.687	1.56957			93.1366
								standard deviation	0.543321	0.0569574	0.186691	0.172672	0.0389786	0.728955	0.629511	0.0221993	0.0335012	0.0868406
RM37_10	BM2	2	1300	10	1			OLIVINE
						INGV	208	RM37_10_ol 3	38.52	0.0963	0.09	3.5	0.2058	49.53	2.44	0	0	0.0584	0.0113	0.0261	94.4779
						INGV	209	RM37_10_ol 4	39.16	0.0879	0.0542	3.46	0.1762	49.44	2.06	0	0.0125	0.0348	0.0399	0	94.5255
						INGV	210	RM37_10_ol 5	39.17	0.1002	0.2241	3.6	0.1836	49.81	2.23	0.0475	0.0094	0	0.0027	0.0616	95.4391
						INGV	214	RM37_10_ol 9	37.93	0.0388	0.1459	3.04	0.1222	49.63	2.11	0.0339	0.0069	0.0719	0.0356	0.0316	93.1968
								average	38.695	0.0808	0.12855	3.4	0.17195	49.6025	2.21	0.02035	0.0072	0.041275	0.022375	0.029825	94.4098
								standard deviation	0.593773	0.0284665	0.0740379	0.247117	0.0354714	0.158614	0.169115	0.0241452	0.00531852	0.0314998	0.0181823	0.0252732
RM37_10	BM2	2	1300	10	1			MONTICELLITE
						INGV	215	RM37_10_mtc 1	34.28	0.3058	0.2702	4.75	0.254	23.52	26.35	0.0985	0.0365	0.9591	0.0062	0.0097	90.84
						INGV	216	RM37_10_mtc 2	31.17	1.5429	1.5887	5.1	0.2338	19.1	25.54	0.3335	0.0941	1.3678	0.0203	0.0145	86.1056
						INGV	217	RM37_10_mtc 3	32.84	0.3616	0.1593	4.58	0.2855	23.44	26.22	0.1974	0.0316	1.2171	0	0.0363	89.3688
						INGV	218	RM37_10_mtc 4	34.42	0.3483	0.1646	4.45	0.2736	26.75	21.6	0.0562	0	0.8046	0.0002	0.0065	88.874
						INGV	219	RM37_10_mtc 5	31.58	0.8486	1.3861	4.72	0.2292	21.4	26.14	0.1066	0.163	1.2928	0	0.0396	87.9059
								average	32.858	0.68144	0.71378	4.72	0.25522	22.842	25.17	0.15844	0.06504	1.12828	0.00534	0.02132	88.6189
								standard deviation	1.4954	0.530198	0.711215	0.243824	0.0244543	2.836	2.01975	0.110563	0.0644275	0.237548	0.00877485	0.0154897
RM37_30	BM2	2	1300	30	1			GLASS
						DST	225	RM37_30 Glass 1	25.079	1.687	4.506	4.916	0.103	12.34	36.108	0.765	0.509	1.28			87.293
						DST	226	RM37_30 Glass 2	24.602	1.673	3.859	5.389	0.207	12.413	36.158	0.779	0.49	1.28			86.85
						DST	227	RM37_30 Glass 3	25.19	1.704	4.433	5.26	0.16	12.43	35.585	0.813	0.511	1.327			87.413
						DST	228	RM37_30 Glass 4	24.895	1.587	3.935	5.042	0.116	12.284	36.123	0.758	0.551	1.26			86.551
						DST	229	RM37_30 Glass 5	24.793	1.664	3.916	5.005	0.111	12.002	36.004	0.777	0.508	1.294			86.074
						DST	230	RM37_30 Glass 6	24.342	1.749	3.847	5.098	0.16	12.167	36.383	0.841	0.491	1.348			86.426
						DST	231	RM37_30 Glass 7	24.984	1.721	4.103	5.329	0.182	12.141	36.005	0.736	0.47	1.132			86.803
						DST	232	RM37_30 Glass 8	24.845	1.421	3.509	4.755	0.19	11.544	36.983	0.792	0.543	1.334			85.916
						DST	233	RM37_30 Glass 9	25.03	1.692	3.624	5.016	0.138	11.29	36.869	0.776	0.521	1.166			86.122
						DST	234	RM37_30 Glass 10	24.097	1.79	4.023	5.284	0.172	12.139	36.284	0.83	0.504	1.35			86.473
								average	24.7857	1.6688	3.9755	5.1094	0.1539	12.075	36.2502	0.7867	0.5098	1.2771			86.5921
								standard deviation	0.34463	0.102248	0.313703	0.201898	0.0356447	0.376328	0.41457	0.0327891	0.0242524	0.074581
RM37_30	BM2	2	1300	30	1			OLIVINE
						INGV	240	RM37_30_ol 1	39.98	0.0682	0.1495	3.06	0.1642	48.95	2.55	0.1217	0	0	0.0026	0.0285	95.0747
						INGV	241	RM37_30_ol 2	40.11	0.0768	0.0458	2.91	0.1935	49.17	2.44	0	0	0.0129	0	0.0059	94.9649
						INGV	244	RM37_30_ol 5	40.96	0.1032	0.1839	3.16	0.1817	49.23	2.51	0	0.0085	0	0	0.0159	96.3532
								average	40.35	0.0827333	0.1264	3.04333	0.1798	49.1167	2.5	0.0405667	0.00283333	0.0043	0.000866667	0.0167667	95.4643
								standard deviation	0.532259	0.0182388	0.0718896	0.125831	0.0147421	0.147422	0.0556776	0.0702635	0.00490748	0.00744782	0.00150111	0.0113249
RM37_30	BM2	2	1300	30	1			MONTICELLITE
						INGV	250	RM37_30_mtc 1	32.61	0.6613	0.18	3.62	0.193	21.83	23.65	0.0399	0.0339	0.591	0	0.0042	83.4133
						INGV	251	RM37_30_mtc 2	33.09	0.1972	0.1622	3.01	0.2184	23.48	22.84	0.0079	0.0177	0.2697	0	0.0218	83.3149
						INGV	252	RM37_30_mtc 3	33.55	0.2636	0.1515	3.23	0.2129	23.73	23.9	0	0.0072	0.3924	0.0512	0	85.4888
						INGV	254	RM37_30_mtc 5	32.39	0.4811	0.2333	2.76	0.1811	23.69	21.92	0.0647	0.0135	0.613	0.0806	0.0051	82.4324
						INGV	255	RM37_30_mtc 6	31.69	0.3272	0.1503	3.46	0.1076	22.19	24.03	0.0481	0.0294	0.4111	0.0128	0.0428	82.4993
						INGV	256	RM37_30_mtc 7	32.77	0.2502	0.0968	2.72	0.1914	23.62	22.28	0.0165	0	0.3432	0	0	82.2881
						INGV	257	RM37_30_mtc 8	33.23	0.314	0.179	3.19	0.1591	22.36	24.46	0.0168	0.02	0.4872	0.0199	0.0123	84.4483
						INGV	258	RM37_30_mtc 9	35.01	0.1846	0.1852	2.79	0.2107	34.71	14.18	0.0152	0	0.224	0.0002	0	87.5099
								average	33.0425	0.3349	0.167288	3.0975	0.184275	24.4512	22.1575	0.0261375	0.0152125	0.41645	0.0205875	0.010775	83.9244
								standard deviation	0.977047	0.161341	0.0387473	0.335761	0.0365122	4.21449	3.34342	0.0222784	0.0125902	0.140738	0.0299689	0.0149915
RM37_50	BM2	2	1300	50	1			GLASS
						DST	261	RM37_50 Glass 2	17.173	1.178	1.687	3.009	0.094	8.143	43.296	0.541	0.396	0.976			76.493
						DST	262	RM37_50 Glass 3	17.139	1.261	1.721	3.039	0.096	8.008	43.401	0.569	0.367	0.96			76.561
						DST	263	RM37_50 Glass 4	18.448	1.274	1.714	2.926	0.101	8.145	43.331	0.526	0.379	0.894			77.738
						DST	264	RM37_50 Glass 5	18.143	1.152	2.086	3.024	0.153	8.563	43.068	0.524	0.388	0.986			78.087
						DST	265	RM37_50 Glass 6	17.986	1.163	1.757	2.965	0.077	8.485	43.798	0.452	0.326	1.097			78.106
						DST	266	RM37_50 Glass 7	18.074	1.256	2.214	3.135	0.111	8.496	43.241	0.483	0.337	0.947			78.294
						DST	267	RM37_50 Glass 8	18.193	1.283	2.183	2.854	0.158	8.513	43.04	0.567	0.406	0.96			78.157
						DST	268	RM37_50 Glass 9	17.482	1.244	2.22	2.936	0.148	8.76	43.567	0.574	0.381	0.953			78.265
						DST	269	RM37_50 Glass 10	17.857	1.222	2.357	2.884	0.099	8.708	43.629	0.549	0.332	0.91			78.547
								average	17.8328	1.22589	1.99322	2.97467	0.115222	8.42456	43.3746	0.531667	0.368	0.964778			77.8053
								standard deviation	0.464546	0.0497078	0.268973	0.0867439	0.0297816	0.26447	0.253375	0.0412735	0.0294534	0.0576298
RM37_50	BM2	2	1300	50	1			SPINEL
						INGV	275	RM37_50_cx 1	0.1997	1.5872	42.25	25.6	0.1391	23.47	0.7684	0	0.024	0.0149	0.6839	0.119	94.8562
						INGV	277	RM37_50_cx 3	1.1617	1.3374	46.69	20.1	0.0973	23.72	2.41	0.0288	0.0315	0.0058	1.9	0.0781	97.5606
						INGV	278	RM37_50_cx 4	0.1969	1.0614	49.42	20.46	0.0695	24.11	0.6219	0.0007	0.0056	0.014	2.01	0.0104	97.9804
						INGV	279	RM37_50_cx 5	1.2565	1.3026	45.49	19.57	0.1854	23.37	3.17	0	0.0086	0.0398	1.89	0.0535	96.3364
								average	0.7037	1.32215	45.9625	21.4325	0.122825	23.6675	1.74257	0.007375	0.017425	0.018625	1.62097	0.06525	96.6834
								standard deviation	0.584869	0.215141	2.9715	2.80228	0.0505819	0.329684	1.25006	0.0142871	0.01237	0.0146984	0.627078	0.0454634
RM37_50	BM2	2	1300	50	1			OLIVINE
						INGV	282	RM37_50_ol 1	39.77	0.1006	0.1975	3.41	0.2085	49.63	2.86		0	0.0035	0	0.0439	96.224
						INGV	283	RM37_50_ol 2	39.47	0.0484	0.1504	3.31	0.1764	48.94	2.85		0.029	0.0631	0	0.0569	95.0942
						INGV	290	RM37_50_ol 9	40.24	0.0911	0.0538	3.49	0.1201	48.79	2.77		0.0103	0.0149	0.0323	0.0344	95.6469
						INGV	291	RM37_50_ol 10	39.02	0.0958	0.8809	4.06	0.1862	46.7	3.78		0	0.0947	0.0122	0.0169	94.8467
								average	39.625	0.083975	0.32065	3.5675	0.1728	48.515	3.065		0.009825	0.04405	0.011125	0.038025	95.453
								standard deviation	0.512933	0.0240317	0.378259	0.336489	0.0376134	1.26408	0.478365		0.0136744	0.0425141	0.0152432	0.0168344
RM44_10	BM3	2	1100	10	12			GLASS
	(SiO2 = 43.92 wt%; CaO = 10.49 wt%)					INGV	135	RM44_10_melt 2	45.51	2.3	10.22	7.81	0.1054	11.91	20.77	1.45	0.3819	0.5578	0.0885	0.0355	101.139
						INGV	136	RM44_10_melt 3	43.65	2.14	9.88	7.82	0.0838	11.9	20.85	1.0288	0.2615	0.3816	0.1081	0.0512	98.155
								average	44.58	2.22	10.05	7.815	0.0946	11.905	20.81	1.2394	0.3217	0.4697	0.0983	0.04335	99.6471
								standard dev	1.31522	0.113137	0.240416	0.00707107	0.0152735	0.00707107	0.0565685	0.297833	0.0851357	0.124592	0.0138593	0.0111016
RM44_10	BM3	2	1100	10	12			CLINOPYROXENE
						INGV	116	RM44_10_spl 3	44.43	2.26	9.92	7.68	0.1047	11.59	22.07	1.1595	0.2674	0.3078	0.1465	0	99.9359
						INGV	119	RM44_10_spl 6	46.34	2.04	8.94	7.64	0.1529	12.08	21.61	0.999	0.193	0.3558	0.1224	0.0422	100.515
						INGV	121	RM44_10_cpx 2	44.11	2.84	9.85	8.21	0.1123	11.02	22.28	0.9802	0.1192	0.6564	0.0615	0.0206	100.26
						INGV	124	RM44_10_cpx 5	45.72	1.87	8.48	7.01	0.1387	12.16	22.26	1.242	0.3144	0.1993	0.0565	0.0595	99.5104
						INGV	125	RM44_10_cpx 6	42.42	2.41	11.6	7.68	0.1115	10.74	19.11	3.16		0.6433	0.078	0.0206	97.9734
						INGV	131	RM44_10_cpx 12	45.25	2.11	9.37	7.29	0.1526	13.28	21.28	1.41	0.402	0.5019	0.0494	0.0666	101.163
						INGV	132	RM44_10_cpx 13	45.5	2.08	11.23	6.99	0.1154	9.87	18.24	2.54		0.6547	0.0104	0	97.2305
								average	44.8243	2.23	9.91286	7.5	0.126871	11.5343	20.9786	1.64153	0.2592	0.474171	0.0749571	0.0299286	99.5867
								standard dev	1.3028	0.318329	1.14597	0.434511	0.0206201	1.11094	1.6334	0.857203	0.108959	0.188156	0.0460453	0.0268804
RM44_10	BM3	2	1100	10	12			SPINEL
						INGV	101	RM44_10_spl 1	0.5644	3.01	15.4	58.81	0.4737	15.69	0.8344	0.0701	0	0.0574	1.1582	0.3131	96.3813
RM44_10	BM3	2	1100	10	12			OLIVINE
						INGV	99	RM44_10_cx dark 2	40.94	0.1625	0.4383	6.15	0.2972	50.23	1.54	0.191	0.0338	0.0992	0.0049	0.1564	100.243
RM44_30	BM3	2	1100	30	12			GLASS
						INGV	171	RM44_30_melt 2	41.9	0.1084	6.08	1.95	0.1059	12.68	34.42	0.5749	0.2145	0.1976	0.0544	0	98.2857
						INGV	172	RM44_30_melt 3	42.86	0.2326	6.22	2.11	0	12.51	33.16	0.4358	0.3422	0.2214	0	0.0797	98.1717
								average	42.38	0.1705	6.15	2.03	0.05295	12.595	33.79	0.50535	0.27835	0.2095	0.0272	0.03985	98.2287
								standard dev	0.678823	0.0878227	0.0989949	0.113137	0.0748826	0.120208	0.890955	0.0983586	0.0902975	0.0168291	0.0384666	0.0563564
RM44_30	BM3	2	1100	30	12			MELILITE
						INGV	138	RM44_30_cx dark 2	42.25	0.1355	5.2	1.68	0.0355	10.37	36.86	2.05	0.2169	0.028	0.0194	0.021	98.8663
						INGV	140	RM44_30_cx dark 4	42.64	0.1564	5.6	1.74	0.1053	10.59	36.69	2.19	0.4957	0.058	0	0.0132	100.279
						INGV	142	RM44_30_cx dark 6	42.15	0.2457	6.41	1.97	0.0617	10.86	35.71	2.11	0.2112	0.0804	0.0003	0	99.8093
						INGV	143	RM44_30_cx dark 7	42.59	0.0648	6.08	1.85	0.106	10.79	36.31	2.55	0.1865	0.0591	0.0028	0.0307	100.62
						INGV	146	RM44_30_cx dark 10	41.62	0.5539	8.03	3.74	0.062	10.31	33.61	2.25	0.2492	0.0846	0.0443	0.037	100.591
						INGV	148	RM44_30_spl 2	42.66	0.2069	5.39	1.57	0.0695	10.31	36.06	2.13	0.4989	0.3901	0	0	99.2854
						INGV	149	RM44_30_spl 3	42.68	0.1593	5.56	1.73	0.0437	11.18	36.33	2.14	0.2141	0.0295	0	0.0211	100.088
						INGV	154	RM44_30_groundmass 4	44.54	0.041	5.33	1.62	0.0026	10.48	36.32	2.06	0.288	0.0336	0.0103	0.0084	100.734
						INGV	162	RM44_30_cx grey 2	42.11	0.1901	6.65	2.12	0.091	9.03	35.33	3.48	0.7597	0.0652	0	0.0246	99.8506
						INGV	163	RM44_30_cx grey 3	42.77	0.1152	5.09	1.75	0.0258	10.61	36.38	2.03	0.1622	0.0534	0.0352	0.0375	99.0593
						INGV	166	RM44_30_cx grey 6	42.34	0.1067	5.36	1.58	0.012	10.74	36.63	1.89	0.1886	0.0222	0	0.0555	98.925
						INGV	168	RM44_30_cx grey 8	43.5	0.1102	7.33	2.04	0.0481	10.48	34.48	2.65	0.4043	0.0951	0.019	0	101.157
								average	42.6542	0.173808	6.0025	1.94917	0.0552667	10.4792	35.8925	2.29417	0.322942	0.0832667	0.0109417	0.02075	99.9386
								standard dev	0.749066	0.132968	0.931227	0.591384	0.0340232	0.522189	0.976302	0.430992	0.18164	0.099489	0.0154221	0.0174965
RM44_30	BM3	2	1100	30	12			SPINEL
						INGV	161	RM44_30_cx grey 1	6.68	1.74	22.19	42.8	0.3285	20.61	7.95	0.2897	0.1177	0.0374	0.5514	0.2103	103.505
RM44_50	BM3	2	1100	50	12			GLASS (to the bottom of the capsule)
						INGV	186	RM44_50_bottom melt 2	16.25	1.5528	2.38	2.29	0.1027	5.93	41.41	2.02	0.9051	0.8106	0	0.0046	73.6558
						INGV	187	RM44_50_bottom melt 3	16.84	1.476	2.05	2.33	0.1487	6.15	44.9	1.88	0.923	0.7437	0.0721	0.0417	77.5552
						INGV	190	RM44_50_bottom melt 6	16.26	1.4204	1.98	2.19	0.0833	5.93	43.46	1.81	0.9219	0.6513	0	0.0454	74.7523
						INGV	191	RM44_50_bottom melt 7	16.69	1.6493	2.35	2.13	0.1273	6.04	44.11	1.67	1.0128	0.7092	0	0.0241	76.5127
								average	16.51	1.52463	2.19	2.235	0.1155	6.0125	43.47	1.845	0.9407	0.7287	0.018025	0.02895	75.619
								standard dev	0.300777	0.0992722	0.20445	0.0914695	0.0285316	0.105317	1.49423	0.145717	0.0487596	0.0665923	0.03605	0.0187048
RM44_50	BM3	2	1100	50	12			GLASS (to the top of the capsule)
						INGV	192	RM44_50_top melt 1	16.24	1.83	2.11	2.23	0.0933	5.67	43.83	1.61	1.1294	0.7909	0.0146	0	75.5482
						INGV	193	RM44_50_top melt 2	18.51	1.5964	2.43	2.66	0.1573	7.11	39.85	2.09	1.26	0.7829	0.0262	0.018	76.4908
						INGV	194	RM44_50_top melt 3	17.89	1.87	2.45	2.45	0.1961	6.26	41.76	1.94	1.0001	0.6763	0.025	0.003	76.5205
						INGV	195	RM44_50_top melt 4	18.54	1.91	2.68	2.73	0.1314	6.87	40.09	2.01	1.0771	0.7955	0	0	76.834
						INGV	196	RM44_50_top melt 5	17.82	2.06	2.67	2.34	0.1171	6.31	40.96	1.89	0.9965	0.97	0.043	0	76.1766
						INGV	200	RM44_50_top melt 9	18.61	2.39	2.96	2.27	0.153	6.36	38.93	1.92	1.1905	0.9785	0.0278	0.0146	75.8044
						INGV	201	RM44_50_top melt 10	14.72	1.83	2.04	2.14	0.1219	6.49	43.91	1.55	0.8509	0.6454	0	0.0135	74.3117
						INGV	202	RM44_50_top melt 11	19.47	2.14	2.84	2.7	0.1538	7.14	40.93	2.34	1.2024	0.9319	0	0.0205	79.8686
						INGV	203	RM44_50_top melt 12	17.16	2.01	2.62	2.65	0.1626	6.37	39.72	1.88	1.1069	0.7584	0	0	74.4379
						INGV	204	RM44_50_top melt 13	18.07	1.624	2.28	2.27	0.0885	5.83	42.35	2.03	1.0338	0.9985	0	0.0015	76.5763
						INGV	205	RM44_50_top melt 14	21.36	1.2921	1.98	2.02	0.1606	6.83	41.8	2.75	1.27	0.9607	0.0028	0	80.4262
						INGV	206	RM44_50_top melt 15	19.53	1.1562	1.4761	1.94	0.1313	6.66	44.22	2.28	1.0479	0.8306	0.0108	0	79.2829
						INGV	216	RM44_50_top capsule 1	18.24	1.98	2.33	2.26	0.1792	6.41	42.41	2.45	1.0256	1.2009	0.0496	0.0015	78.5368
						INGV	218	RM44_50_top capsule 3	17.74	1.73	2.47	2.42	0.1096	6.3	40.43	2.36	1.1038	0.7958	0.0049	0	75.4641
						INGV	219	RM44_50_top capsule 4	18.3	2.22	2.62	2.53	0.0954	6.46	41.73	1.96	1.26	0.953	0.0301	0.0036	78.1621
						INGV	220	RM44_50_top capsule 5	18.08	1.8	2.31	2.26	0.1694	6.06	40.2	2.38	1.23	0.8118	0	0	75.3012
								average	18.1425	1.83992	2.39163	2.36687	0.138781	6.44562	41.445	2.09	1.11156	0.867569	0.014675	0.0047625	76.8589
								standard dev	1.44275	0.31909	0.3682	0.239492	0.0325232	0.40965	1.59757	0.316775	0.118424	0.140686	0.0167639	0.00731764
RM43_10	BM3	2	1200	10	6			GLASS
						DST		RM43-10 glass 1	42.613	2.052	10.814	8.477	0.189	11.336	18.027	2.495	0.996	0.655			97.654
						DST		RM43-10 glass 2	42.666	1.984	11.035	8.647	0.191	11.531	17.891	2.549	0.941	0.598			98.033
						DST		RM43-10 glass 3	42.557	1.999	10.981	8.52	0.155	11.687	17.652	2.365	0.921	0.587			97.424
						DST		RM43-10 glass 4	42.945	2.058	10.822	8.741	0.201	11.722	17.788	2.354	0.992	0.601			98.224
						DST		RM43-10 glass 5	42.363	1.916	10.958	9.066	0.15	10.773	18.404	2.428	0.974	0.537			97.569
								average	42.6288	2.0018	10.922	8.6902	0.1772	11.4098	17.9524	2.4382	0.9648	0.5956			97.7808
								standard dev	0.210607	0.0578031	0.0990076	0.234571	0.0230695	0.387285	0.287465	0.0837478	0.0327216	0.0420452
RM43_10	BM3	2	1200	10	6			OLIVINE
						INGV	483	RM43_30_ol 3	41.78	0.0871	0.0161	5.06	0.1724	52.52	0.683	0.0274			0.0162	0.1143	100.477
						INGV	485	RM43_30_ol 5	42.15	0.0664	0.0862	4.9	0.0985	52.15	0.6555	0			0.015	0.107	100.229
						INGV	486	RM43_30_ol 6	41.49	0.0715	0.0836	4.84	0.1854	52.58	0.6428	0.1173			0.0672	0.183	100.261
						INGV	487	RM43_30_ol 7	41.59	0.0318	0.118	4.97	0.1655	52.78	0.704	0.0196			0.0371	0.1526	100.569
						INGV	488	RM43_30_ol 8	40.78	0.0757	0.1206	5.11	0.1475	52.89	0.7199	0			0.0289	0.1318	100.004
						INGV	489	RM43_30_ol 9	41.79	0.1042	0.0615	5.14	0.1742	51.85	0.7545	0.0385			0.0531	0.1371	100.103
						INGV	490	RM43_30_ol 10	41.52	0.0792	0.038	4.93	0.141	51.97	0.6593	0			0.0263	0.1629	99.5267
						INGV	491	RM43_30_ol 11	41.61	0.0594	0.167	4.98	0.1705	52.69	0.7075	0.0103			0.0472	0.1132	100.555
						INGV	492	RM43_30_ol 12	41.5	0.0439	0.035	4.95	0.2208	53.04	0.6411	0.0246			0	0.1544	100.61
						INGV	493	RM43_30_ol 13	41.47	0.0439	0.0576	5	0.181	52.84	0.6642	0.0283			0.042	0.163	100.49
								average	41.568	0.06631	0.07836	4.988	0.16568	52.531	0.68318	0.0266			0.0333	0.14193	100.282
								standard dev	0.346211	0.0220913	0.0464305	0.0931904	0.0320686	0.407825	0.0373539	0.0346619			0.0200808	0.0253304
RM43_10	BM3	2	1200	10	6			CLINOPYROXENE
						INGV	496	RM43_30_cpx 1	42.84	1.95	11.11	8.42	0.1509	12.18	21.19	0.5306	0.0799	0.5523	0.1008	0.0301	99.1346
						INGV	497	RM43_30_cpx 2	42.52	2.32	10.69	9.37	0.1551	12.18	20.84	0.5208	0.019	0.6259	0.0614	0.0305	99.3327
						INGV	498	RM43_30_cpx 3	41.21	2.46	11.06	10.51	0.1681	10.84	20.96	0.67	0.2566	0.5972	0.0286	0	98.7605
						INGV	505	RM43_30_cpx 10	41.99	2.29	10.88	9.69	0.1592	11.28	20.93	0.7821	0.3327	0.5498	0.142	0.0229	99.0487
						INGV	506	RM43_30_cpx 11	42.82	2.26	10.05	9.5	0.1632	13.31	20.12	0.5518	0.0907	0.5712	0.0906	0.0046	99.5321
						INGV	510	RM43_30_cpx 15	41.95	2.16	10.25	9.72	0.1192	12.41	21.14	0.4265	0.0713	0.6587	0.0568	0.0266	98.9891
						INGV	511	RM43_30_cpx 16	41.56	2.44	10.25	10.38	0.0988	11.93	21.25	0.4141	0.0795	0.6093	0.0895	0.0206	99.1218
								average	42.1271	2.26857	10.6129	9.65571	0.144929	12.0186	20.9186	0.556557	0.132814	0.594914	0.0813857	0.0193286	99.1314
								standard dev	0.62657	0.174397	0.429058	0.694331	0.0258307	0.797442	0.382598	0.130972	0.115059	0.0401135	0.0364965	0.0122379
RM43_30	BM3	2	1200	30	6			GLASS
						DST		RM43-30 glass 1	35.641	1.509	8.325	6.375	0.221	11.582	28.06	1.85	0.747	0.518			94.828
						DST		RM43-30 glass 2	35.474	1.592	8.397	6.532	0.165	11.619	27.771	1.859	0.799	0.474			94.682
						DST		RM43-30 glass 3	36.046	1.46	8.214	6.402	0.121	11.424	27.901	1.877	0.78	0.566			94.791
						DST		RM43-30 glass 4	35.945	1.54	8.333	6.609	0.155	11.408	28.289	1.867	0.815	0.507			95.468
						DST		RM43-30 glass 5	35.8	1.516	8.197	6.225	0.079	11.171	28.421	1.893	0.78	0.532			94.614
						DST		RM43-30 glass 6	35.799	1.479	8.216	6.454	0.121	11.397	28.514	1.878	0.793	0.487			95.138
						DST		RM43-30 glass 7	35.608	1.55	8.501	6.754	0.152	11.567	28.417	1.963	0.778	0.451			95.741
								average	35.759	1.52086	8.31186	6.47871	0.144857	11.4526	28.1961	1.88386	0.784571	0.505			95.0374
								standard dev	0.199247	0.0445287	0.11225	0.171862	0.0444088	0.154228	0.28734	0.0375874	0.0212199	0.0383493
RM43_30	BM3	2	1200	30	6			OLIVINE
						INGV	527	RM43_10_ol 1	41.48	0.0558	0.1612	3.66	0.1488	51.91	1.85				0.016	0.0795	99.3613
						INGV	528	RM43_10_ol 2	41.6	0.0068	0.071	3.79	0.1462	52.31	1.74				0.0745	0.1506	99.8891
						INGV	529	RM43_10_ol 3	41.54	0.006	0.0231	3.82	0.0958	51.98	1.69				0.0687	0.0918	99.3154
						INGV	530	RM43_10_ol 4	41.16	0.0214	0.1044	3.83	0.1572	52.13	1.71				0.0021	0.0501	99.1652
						INGV	531	RM43_10_ol 5	41.71	0.0582	0.1042	3.82	0.1618	52.09	1.76				0	0.1353	99.8395
						INGV	533	RM43_10_ol 7	41.63	0.042	0.1006	3.45	0.1064	51.82	1.73				0.0253	0.1183	99.0226
						INGV	534	RM43_10_ol 8	42.03	0.0754	0.1384	3.73	0.1637	51.82	1.97				0	0.0633	99.9908
						INGV	535	RM43_10_ol 9	41.43	0.0462	0.1029	3.71	0.13	52.5	1.69				0	0.0664	99.6755
						INGV	536	RM43_10_ol 10	41.44	0.024	0.1046	3.94	0.1771	52.01	1.67				0.0326	0.0851	99.4834
						INGV	537	RM43_10_ol 11	41.67	0.0368	0.175	3.64	0.1491	51.89	1.67				0.062	0.1157	99.4086
						INGV	538	RM43_10_ol 12	41.37	0.0657	0.1142	3.74	0.1579	51.96	1.54				0.112	0.0727	99.1325
						INGV	540	RM43_10_ol 14	41.28	0.064	0.0639	3.74	0.0906	51.94	1.68				0.0807	0.1221	99.0613
						INGV	541	RM43_10_ol 15	41.63	0.0163	0.0833	3.66	0.0878	52.17	1.62				0.0122	0.1061	99.3857
						INGV	542	RM43_10_ol 16	41.79	0.0308	0.1225	3.91	0.1214	51.84	1.73				0.0101	0.13	99.6848
						INGV	544	RM43_10_ol 18	41.66	0.0249	0.0803	3.18	0.122	52.63	1.62				0	0.0614	99.3786
						INGV	545	RM43_10_ol 19	41.62	0.0649	0.143	3.69	0.139	51.98	1.7				0.0565	0.0629	99.4563
						INGV	546	RM43_10_ol 20	41.75	0.0375	0.1228	3.71	0.1374	52.07	1.75				0.0641	0.1095	99.7513
						INGV	549	RM43_10_ol 23	41.26	0.0461	0.1105	3.63	0.1615	52.01	1.56				0	0.1268	98.9049
						INGV	550	RM43_10_ol 24	41.68	0.0461	0.1145	3.74	0.1038	51.95	1.79				0.0778	0.0748	99.577
						INGV	551	RM43_10_ol 25	41.74	0.069	0.1128	3.46	0.0816	52.6	1.61				0.0716	0.1498	99.8948
								average	41.5735	0.041895	0.10766	3.6925	0.131955	52.0805	1.704				0.03831	0.09861	99.4689
								standard dev	0.207143	0.0209355	0.0340466	0.172073	0.0291481	0.246181	0.0976783				0.0359179	0.0316106
RM43_30	BM3	2	1200	30	6			SPINEL
						INGV	552	RM43_10_sp 1	0.6164	0.9692	37.81	27.72	0.1944	22.92	0.6179				6.74	0.0847	97.6726
						INGV	555	RM43_10_sp 4	4.01	1.0557	34.23	25.27	0.1756	21.92	2.02				9.11	0.106	97.8973
						INGV	557	RM43_10_sp 6	2.7	0.9551	33.99	26.07	0.1832	22.34	1.58				10.59	0.1066	98.5149
						INGV	558	RM43_10_sp 7	0.3656	0.8641	37.97	26.55	0.1602	22.83	0.6277				8.37	0.1025	97.8401
						INGV	559	RM43_10_sp 8	1.4312	0.9873	35.54	27.89	0.1763	22.57	1.45				8.38	0.0738	98.4986
								average	1.82464	0.96628	35.908	26.7	0.17794	22.516	1.25912				8.638	0.09472	98.0847
								standard dev	1.52361	0.0689421	1.9039	1.10914	0.0124647	0.403398	0.6181				1.39408	0.014722
RM43_50	BM3	2	1200	50	6			GLASS
						DST		RM43-50 glass 1	26.279	1.063	5.049	3.306	0.086	8.768	38.938	1.266	0.557	0.354			85.666
						DST		RM43-50 glass 2	26.102	1.141	5.103	3.235	0.059	8.867	38.709	1.379	0.503	0.373			85.471
						DST		RM43-50 glass 3	25.984	1.019	5.088	2.926	0.114	8.881	38.142	1.33	0.519	0.357			84.36
						DST		RM43-50 glass 4	26.055	1.103	5.106	3.239	0.119	8.977	38.636	1.348	0.543	0.376			85.502
						DST		RM43-50 glass 5	26.289	1.071	5.248	3.051	0.025	9.03	38.696	1.318	0.554	0.384			85.666
						DST		RM43-50 glass 6	25.871	1.114	5.188	3.179	0.03	9.14	39.024	1.331	0.547	0.312			85.736
								average	26.0967	1.08517	5.13033	3.156	0.0721667	8.94383	38.6908	1.32867	0.537167	0.359333			85.4002
								standard dev	0.164694	0.043213	0.0733721	0.141481	0.0407697	0.132495	0.308763	0.037297	0.0214701	0.0258741
RM43_50	BM3	2	1200	50	6			SPINEL
						INGV	452	RM43_50_cx 2	1.0659	0.5235	48.51	20.36	0.0879	24.89	2.25				2.73	0.1194	100.537
						INGV	453	RM43_50_cx 3	0.5532	0.4617	48.83	21.34	0.0699	24.57	1.56				3	0.1404	100.525
						INGV	454	RM43_50_cx 4	0.444	0.474	50.1	18.81	0.1391	24.83	1.45				3.51	0.0861	99.8432
						INGV	455	RM43_50_cx 5	0.5342	0.5316	49.7	19.04	0.1097	24.54	1.1544				4.19	0.0753	99.8752
						INGV	458	RM43_50_cx 8	0.0902	0.3841	53.06	15.97	0.1278	25.28	0.6169				4.19	0.0642	99.7832
						INGV	459	RM43_50_cx 9	0.9418	0.6217	47.8	22.23	0.1355	24.98	1.1255				3.03	0.1316	100.996
						INGV	461	RM43_50_cx 11	0.2628	0.5223	49.33	22.2	0.0786	24.36	0.701				2.03	0.1475	99.6322
								average	0.556014	0.5027	49.6186	19.9929	0.106929	24.7786	1.2654				3.24	0.109214	100.17
								standard dev	0.347564	0.0734662	1.69917	2.24783	0.0283735	0.311632	0.55697				0.785684	0.0335508
RM42_10	BM3	2	1300	10	1			GLASS
						DST		RM45-10 glass 1	41.463	1.865	10.678	9.431	0.139	12.465	16.786	2.347	0.993	0.589			96.756
						DST		RM45-10 glass 2	42.29	1.884	10.667	9.228	0.169	12.272	17.241	2.289	0.903	0.587			97.53
						DST		RM45-10 glass 3	41.702	1.881	10.81	9.432	0.144	12.487	16.964	2.278	0.969	0.459			97.126
						DST		RM45-10 glass 4	41.211	1.867	10.667	9.636	0.159	12.519	16.872	2.281	0.935	0.558			96.705
						DST		RM45-10 glass 5	42.021	1.949	10.446	9.224	0.152	12.447	16.823	2.355	0.994	0.502			96.913
								average	41.7374	1.8892	10.6536	9.3902	0.1526	12.438	16.9372	2.31	0.9588	0.539			97.006
								standard dev	0.384562	0.0308182	0.117058	0.153467	0.0106696	0.0864037	0.163197	0.0337639	0.0351932	0.0508606
RM45_10	BM3	2	1300	10	4			GLASS
						INGV	78	RM45_10_Mel 1	43.32	1.97	10.86	9.54	0.2168	13.35	16.36	2.37	1.0573	0.4679	0.0443	0.0061	99.5624
						INGV	79	RM45_10_Mel 2	42.47	2.03	10.85	9.81	0.1613	13.17	16.29	2.37	0.9955	0.6216	0.0426	0.0169	98.8279
						INGV	82	RM45_10_Mel 5	42.79	2.04	11.08	9.96	0.1662	11.1	17.05	2.59	0.9427	0.6226	0.0357	0.0342	98.4114
						INGV	84	RM45_10_Mel 7	42.84	2.03	11.2	9.4	0.1567	12.76	16.46	2.24	1.0011	0.4438	0.0261	0.0381	98.5958
						INGV	86	RM45_10_Mel 9	42.9	1.99	11.21	9.51	0.1544	12.82	16.11	2.48	0.9953	0.5244	0.0567	0.0333	98.7841
						INGV	91	RM45_10_Mel 14	43.07	2.05	11.2	9.91	0.1732	11	17.44	2.32	1.0034	0.6055	0.0918	0	98.8639
						INGV	92	RM45_10_Mel 15	41.92	2.1	11.4	9.98	0.1685	11.16	17.22	2.84	0.9563	0.5037	0.0284	0	98.2769
						INGV	93	RM45_10_Mel 16	42.31	2.04	10.98	9.77	0.1178	11.78	17.19	2.29	0.944	0.6315	0.0368	0.025	98.1151
								average	42.7025	2.03125	11.0975	9.735	0.164362	12.1425	16.765	2.4375	0.98695	0.552625	0.0453	0.0192	98.6797
								standard deviation	0.447589	0.0390741	0.191591	0.223287	0.0272127	0.988719	0.512166	0.196669	0.0383684	0.0764223	0.0211091	0.0157155
RM42_10	BM3	2	1300	10	1			OLIVINE
						INGV	402	RM42_10_ol 1	42.08	0.0522	0.0418	4.5	0.1172	52.02	0.7137			0.0637	0.0756	0.1813	99.8455
						INGV	403	RM42_10_ol 2	42.2	0.0717	0.0773	4.31	0.14	51.83	0.6825			0.1325	0.0632	0.174	99.6812
						INGV	404	RM42_10_ol 3	42.24	0.1125	0.0637	4.34	0.1327	52.33	0.7422			0.0907	0.03	0.2025	100.284
						INGV	405	RM42_10_ol 4	42.31	0.0629	0.115	4.23	0.1677	52.35	0.6551			0.0037	0	0.2307	100.125
						INGV	406	RM42_10_ol 5	42.54	0.0638	0.0876	4.44	0.1656	52.08	0.625			0.0781	0.0414	0.2296	100.351
						INGV	407	RM42_10_ol 6	41.68	0.077	0.1186	4.26	0.1288	52.3	0.5721			0.0024	0.0536	0.2016	99.3941
						INGV	408	RM42_10_ol 7	42.34	0.0336	0.065	4.24	0.1238	52.39	0.5953			0.0411	0.0792	0.2058	100.114
						INGV	409	RM42_10_ol 8	42	0.0548	0.076	4.33	0.1654	52.12	0.6286			0.014	0.0209	0.2456	99.6553
						INGV	410	RM42_10_ol 9	42.11	0.0867	0.0816	4.44	0.1608	51.8	0.6988			0.0229	0.0377	0.2513	99.6898
						INGV	411	RM42_10_ol 10	41.2	0.0632	0.186	6.09	0.1419	51.17	0.77			0.0451	0.1328	0.1946	99.9936
						INGV	412	RM42_10_ol 11	41.63	0.0837	0.1205	5.54	0.1666	50.83	0.6917			0.0522	0.0477	0.2367	99.3991
						INGV	414	RM42_10_ol 13	41.95	0.0556	0.0852	4.77	0.1097	52.12	0.6305			0.0505	0.0367	0.2631	100.071
						INGV	415	RM42_10_ol 14	41.9	0.0901	0.1258	4.79	0.2157	52.4	0.6546			0.0439	0.0345	0.2635	100.518
								average	42.0138	0.0698308	0.0957	4.63692	0.148915	51.98	0.666162			0.0492923	0.0502538	0.221562	99.9325
								standard deviation	0.354578	0.0202971	0.0371316	0.564127	0.0285598	0.482234	0.0572352			0.0365364	0.0328439	0.0301994
RM45_10	BM3	2	1300	10	4			OLIVINE
						INGV	63	RM45_10_ol 1	41.18	0.0262	0.1193	4.64	0.1188	53.87	0.6755			0.2036	0.0241	0.2136	101.071
						INGV	68	RM45_10_ol 6	41.27	0.0478	0.0625	4.44	0.1531	54	0.5894			0.0895	0.0397	0.2	100.892
						INGV	69	RM45_10_ol 7	41.51	0.0168	0.0712	4.34	0.165	53.66	0.5721			0.1019	0.0669	0.1851	100.689
						INGV	72	RM45_10_ol 10	41.01	0.0543	0.1051	4.59	0.1435	53.83	0.6985			0	0.0374	0.2313	100.7
						INGV	73	RM45_10_ol 11	41.37	0.0515	0.1193	4.65	0.1461	54	0.6801			0.0925	0.0154	0.2295	101.354
						INGV	75	RM45_10_ol 13	41.62	0.0693	0.0878	4.19	0.1168	53.44	0.5716			0.2112	0	0.2411	100.548
								average	41.3267	0.0443167	0.0942	4.475	0.14055	53.8	0.6312			0.11645	0.0305833	0.216767	100.876
								standard deviation	0.222051	0.0193543	0.0243051	0.185338	0.0191412	0.216795	0.0594562			0.0795549	0.0230495	0.0212574
RM45_10	BM3	2	1300	10	4			SPINEL
						INGV	95	RM45_10_spl 1	0.1086	1.3089	16.48	41.11	0.275	18.79	0.373	0	0	0.0698	18.94	0.2277	97.683
						INGV	96	RM45_10_spl 2	0.1578	1.2152	17.48	41.59	0.235	19.39	0.3392	0	0	0	18.91	0.3148	99.632
						INGV	97	RM45_10_spl 3	0.5002	1.3331	17.66	40.89	0.2216	19.98	0.3269	0	0.0172	0.0051	19	0.2921	100.226
						INGV	98	RM45_10_spl 4	0.1378	1.2347	16.97	39.73	0.2944	19.61	0.4054	0.0983	0.0047	0	19.06	0.284	97.8293
						INGV	99	RM45_10_spl 5	0.1286	1.1578	17.96	39.98	0.2153	19.65	0.1863	0.0525	0.0059	0.0068	19.63	0.3142	99.2874
						INGV	100	RM45_10_spl 6	0.117	1.2969	17.43	40.16	0.2688	19.11	0.3292	0.0486	0.0014	0.0054	19.39	0.3293	98.4866
								average	0.191667	1.25777	17.33	40.5767	0.251683	19.4217	0.326667	0.0332333	0.00486667	0.0145167	19.155	0.293683	98.8574
								standard deviation	0.152114	0.066571	0.527333	0.728826	0.032151	0.423434	0.075116	0.0403841	0.00652063	0.0272362	0.289879	0.0362918
RM42_10	BM3	2	1300	10	1			CLINOPYROXENE
						INGV	416	RM42_10_gray 1	42.03	2.41	11.57	10.8	0.1153	9.7	21.16	0.7351	0.4582	0.6509	0.0686	0.0443	99.7424
						INGV	417	RM42_10_gray 2	41.57	2.36	10.79	11.83	0.1926	11.44	18.94	1.2935	0.5534	0.6505	0.0557	0.0261	99.7018
						INGV	419	RM42_10_gray 4	43.41	2.31	8.67	9.92	0.0857	11.47	22.09	0.4356	0.0859	0.5369	0.0463	0.0019	99.0623
						INGV	429	RM42_10_gray 14	43.18	2.29	9.87	10.05	0.1497	12.23	21.21	0.5407	0.0433	0.5675	0.0302	0.0136	100.175
								average	42.5475	2.3425	10.225	10.65	0.135825	11.21	20.85	0.751225	0.2852	0.60145	0.0502	0.021475	99.6704
								standard deviation	0.888308	0.0537742	1.24797	0.877078	0.0460062	1.07098	1.34306	0.382214	0.258261	0.0582252	0.016166	0.0181436
RM45_10	BM3	2	1300	10	4			CLINOPYROXENE
						INGV	102	RM45_10_cx 2	42.77	1.98	12.02	9.37	0.0894	10.82	19.34	1.0373	0.7516	0.6646	0.0227	0.0466	98.9122
						INGV	104	RM45_10_cx 4	40.3	2.86	11.57	12.24	0.1701	9.4	21.1	0.8334	0.2755	0.6523	0.0356	0.0319	99.4688
						INGV	105	RM45_10_cx 5	41.04	2.54	11.22	10.77	0.1422	11.68	21.59	0.6623	0.2444	0.6449	0.0769	0.0175	100.628
						INGV	108	RM45_10_cx 8	42.13	2.29	10.52	10.75	0.0866	12.76	20.59	0.556	0.0848	0.5468	0.014	0.0149	100.343
						INGV	109	RM45_10_cx 9	42.42	2.02	11.26	10.54	0.0838	11.61	21.29	0.6458	0.2797	0.5548	0.1061	0.0336	100.844
								average	41.732	2.338	11.318	10.734	0.11442	11.254	20.782	0.74696	0.3272	0.61268	0.05106	0.0289	100.039
								standard deviation	1.0294	0.36908	0.549108	1.02075	0.0394003	1.24518	0.884347	0.190811	0.250329	0.0569952	0.0390956	0.0129455
RM42_30	BM3	2	1300	30	1			GLASS
						DST		RM45-30 glass 1	35.877	1.458	8.148	7.121	0.125	13.145	27.101	1.902	0.702	0.436			96.015
						DST		RM45-30 glass 2	35.648	1.511	8.126	7.184	0.135	12.867	27.2	1.849	0.756	0.463			95.739
						DST		RM45-30 glass 3	35.653	1.49	8.144	7.154	0.091	12.91	27.526	1.856	0.758	0.483			96.065
						DST		RM45-30 glass 4	35.94	1.518	8.169	7.057	0.111	12.856	27.345	1.85	0.706	0.419			95.971
						DST		RM45-30 glass 5	36.144	1.485	8.296	6.97	0.128	12.969	27.209	1.839	0.74	0.372			96.152
						DST		RM45-30 glass 6	35.846	1.409	8.266	7.006	0.103	12.808	27.237	1.816	0.738	0.455			95.684
								average	35.8513	1.4785	8.1915	7.082	0.1155	12.9258	27.2697	1.852	0.733333	0.438			95.9377
								standard deviation	0.18702	0.0401036	0.0712959	0.0849164	0.0167541	0.120309	0.14794	0.0282631	0.0241551	0.0391408
RM45_30	BM3	2	1300	30	4			GLASS
						INGV	153	RM45_30_Mel 1	37.02	1.5916	8.2	7.18	0.1117	13.56	25.89	1.97	0.7774	0.3538	0.0139	0	96.6684
						INGV	154	RM45_30_Mel 2	35.94	1.5837	8.75	7.11	0.1527	13.28	26.1	2.06	0.7122	0.4515	0.0248	0.0569	96.2218
						INGV	155	RM45_30_Mel 3	36.46	1.6475	8.4	7.13	0.1426	13.09	26.31	1.95	0.7941	0.4827	0.0335	0.0202	96.4606
						INGV	159	RM45_30_Mel 7	36.29	1.5773	8.44	7.12	0.0843	13.16	25.92	1.89	0.8296	0.508	0	0	95.8192
						INGV	160	RM45_30_Mel 8	36.05	1.6044	8.49	7.14	0.1427	13.45	26.37	1.8	0.8528	0.4969	0.0322	0	96.429
						INGV	163	RM45_30_Mel 11	36.34	1.5626	8.43	7.14	0.1361	13.34	26.72	2.05	0.8076	0.5614	0.0094	0.0146	97.1117
						INGV	164	RM45_30_Mel 12	36.39	1.5887	8.68	6.95	0.1769	13.25	26.62	1.75	0.7106	0.5011	0	0.0118	96.6291
						INGV	166	RM45_30_Mel 14	35.96	1.69	8.78	7.29	0.1235	13.27	26.06	1.7	0.7152	0.5499	0.0559	0.0384	96.2329
						INGV	167	RM45_30_Mel 15	36.22	1.6422	8.57	6.97	0.1895	13.17	26.34	1.93	0.799	0.4441	0.0896	0.0454	96.4098
								average	36.2967	1.60978	8.52667	7.11444	0.14	13.2856	26.2589	1.9	0.777611	0.483267	0.0288111	0.0208111	96.4425
								standard deviation	0.329355	0.0413431	0.187216	0.102848	0.0319727	0.147573	0.29161	0.126984	0.0532086	0.0622149	0.0290214	0.0213186
RM42_30	BM3	2	1300	30	1			OLIVINE
						INGV	358	RM42_30_ol 1	42.11	0.0413	0.1186	3.14	0.0932	53.33	2.01			0.2034	0.0474	0.1128	101.207
						INGV	359	RM42_30_ol 2	41.62	0.098	0.1702	3.02	0.1608	52.95	2.05			0.1454	0.0028	0.085	100.302
						INGV	360	RM42_30_ol 3	41.51	0.0691	0.2022	3.19	0.1397	53.74	1.9			0.1902	0	0.1524	101.094
						INGV	361	RM42_30_ol 4	41.83	0.062	0.1444	3.24	0.1906	53.13	1.87			0.161	0.0122	0.1293	100.77
						INGV	366	RM42_30_ol 9	41.59	0.0664	0.1007	3.13	0.1532	53.18	2.22			0.1098	0.0336	0.1147	100.698
								average	41.732	0.06736	0.14722	3.144	0.1475	53.266	2.01			0.16196	0.0192	0.11884	100.814
								standard deviation	0.242116	0.0203139	0.0404415	0.0820366	0.0356241	0.297708	0.139104			0.0371167	0.0205499	0.0246701
RM42_30	BM3	2	1300	30	1			SPINEL
						INGV	383	RM42_30_spl 5	0.1809	1.1114	32.91	36.49	0.1288	23.02	0.3615				5.03	0.2609	99.4935
						INGV	384	RM42_30_spl 6	0.1489	1.09	32.42	34.29	0.1031	22.51	0.3591				7.85	0.3648	99.1359
						INGV	385	RM42_30_spl 7	0.1641	0.9006	30.79	31.66	0.1944	22.19	0.3431				12.54	0.225	99.0072
						INGV	386	RM42_30_spl 8	0.3003	1.0201	32.48	34.28	0.1775	22.7	0.3797				8.15	0.2155	99.7031
						INGV	387	RM42_30_spl 9	0.0888	1.1231	31.12	34.48	0.1676	22.6	0.3224				9.67	0.2892	99.8611
								average	0.1766	1.04904	31.944	34.24	0.15428	22.604	0.35316				8.648	0.27108	99.4402
								standard deviation	0.0773831	0.0920914	0.929747	1.71614	0.0373993	0.301048	0.0215441				2.74622	0.0600581
RM45_30	BM3	2	1300	30	4			SPINEL
						INGV	168	RM45_30_cx 1	0.1916	0.9258	31.87	31.69	0.113	22.97	0.4403				10.77	0.2199	99.1906
						INGV	169	RM45_30_cx 2	1.0061	1.1123	32.49	32.39	0.1663	23.24	0.7524				9	0.1635	100.321
						INGV	170	RM45_30_cx 3	0.492	0.9431	30.87	32.39	0.1388	23.57	0.6229				10.65	0.2019	99.8787
						INGV	172	RM45_30_cx 5	0.4741	1.131	32.09	33.49	0.1695	22.78	0.6614				8.49	0.1384	99.4244
						INGV	173	RM45_30_cx 6	0.2314	1.0208	31.27	32.36	0.1599	23	0.6388				10.66	0.1528	99.4937
						INGV	174	RM45_30_cx 7	0.0901	1.0254	31.75	32.73	0.1735	22.78	0.3265				10.12	0.1366	99.1321
						INGV	175	RM45_30_cx 8	0.1216	1.0744	30.2	32.64	0.1714	22.64	0.3561				11.33	0.2145	98.748
						INGV	176	RM45_30_cx 9	0.0678	0.938	31.05	33.44	0.1914	22.99	0.3122				11.18	0.1591	100.328
								average	0.334338	1.02135	31.4488	32.6412	0.160475	22.9963	0.513825				10.275	0.173338	99.5646
								standard deviation	0.316809	0.0804684	0.741513	0.594797	0.0241565	0.295148	0.174126				1.02133	0.0337423
RM42_50	BM3	2	1300	50	1			GLASS
						DST		RM45-50 glass 1	26.731	1.046	5.634	4.673	0.14	9.4	37.715	1.247	0.512	0.339			87.437
						DST		RM45-50 glass 2	26.748	1.167	5.725	4.597	0.067	9.399	37.839	1.42	0.481	0.302			87.745
						DST		RM45-50 glass 3	26.689	1.016	5.583	4.616	0.064	9.357	37.679	1.28	0.496	0.348			87.128
						DST		RM45-50 glass 4	27.008	1.075	5.772	4.691	0.096	9.292	38.26	1.338	0.502	0.342			88.376
						DST		RM45-50 glass 5	27.079	1.105	5.817	4.708	0.074	9.535	37.984	1.357	0.524	0.356			88.539
						DST		RM45-50 glass 6	26.834	1.085	5.911	4.745	0.099	9.502	37.912	1.312	0.492	0.401			88.293
								average	26.8482	1.08233	5.74033	4.67167	0.09	9.41417	37.8982	1.32567	0.501167	0.348			87.9197
								standard deviation	0.160079	0.0518909	0.120253	0.0561201	0.0285587	0.0904863	0.211455	0.0608167	0.0152107	0.0319562
RM45_50	BM3	2	1300	50	4			GLASS
						INGV	119	RM45_50_Mel 1	27.03	1.1059	5.72	4.79	0.0897	9.46	35.5	1.3216	0.5882	0.4594	0	0	86.0648
						INGV	120	RM45_50_Mel 2	27.59	1.1393	5.65	4.77	0.0897	9.33	35.5	1.3278	0.4865	0.3073	0	0.0267	86.2173
						INGV	121	RM45_50_Mel 3	27.4	1.311	5.79	4.79	0.083	9.07	35.18	1.1637	0.5661	0.3877	0	0.0219	85.7634
						INGV	122	RM45_50_Mel 4	28.26	1.223	5.86	4.53	0.0968	9.27	35.2	1.1824	0.5932	0.4166	0	0.0356	86.6676
						INGV	123	RM45_50_Mel 5	27.39	1.2143	5.79	4.79	0.061	9.52	35.68	1.39	0.5432	0.4035	0	0.0599	86.8419
						INGV	124	RM45_50_Mel 6	27.02	1.0809	5.85	4.58	0.1137	9.38	36.11	1.36	0.5611	0.3846	0	0.0526	86.4929
						INGV	125	RM45_50_Mel 7	27.85	1.3009	5.88	4.83	0.0796	9.91	35.09	1.1537	0.485	0.3651	0.0074	0.0134	86.9651
						INGV	126	RM45_50_Mel 8	26.82	1.2709	5.54	4.73	0.1142	9.58	34.52	1.2653	0.5149	0.3341	0	0.0252	84.7146
						INGV	127	RM45_50_Mel 9	27.73	1.204	5.96	4.7	0.1476	9.67	36.31	1.2702	0.5132	0.3909	0.0307	0.051	87.9776
						INGV	128	RM45_50_Mel 10	27.38	1.2643	5.89	4.78	0.1018	9.74	36.23	1.48	0.5384	0.4008	0.0342	0.0051	87.8446
						INGV	129	RM45_50_Mel 11	27.86	1.2968	5.84	4.74	0.1065	9.89	36.05	1.45	0.5019	0.3968	0.0264	0.0019	88.1603
						INGV	130	RM45_50_Mel 12	27.13	1.2435	6.15	4.68	0.0924	9.57	36.25	1.41	0.5419	0.2993	0.0631	0.0168	87.447
						INGV	131	RM45_50_Mel 13	27.09	1.2426	5.78	4.74	0.0679	9.43	35.55	1.36	0.5906	0.4157	0.0064	0.0133	86.2865
						INGV	132	RM45_50_Mel 14	28.05	1.2642	5.69	4.63	0.0359	9.49	35.32	1.263	0.5505	0.3055	0.0041	0.0312	86.6344
						INGV	133	RM45_50_Mel 15	27.79	1.2063	5.67	4.71	0.1209	9.58	35.81	1.3243	0.5483	0.336	0.0345	0.0373	87.1676
						INGV	134	RM45_50_Mel 16	27.67	1.2525	5.73	4.77	0.1167	9.5	35.82	1.3417	0.5702	0.3051	0.033	0	87.1092
								average	27.5038	1.22627	5.79938	4.7225	0.0948375	9.52438	35.6325	1.31648	0.543325	0.369275	0.0149875	0.0244937	86.7722
								standard deviation	0.413213	0.0673724	0.141726	0.0825025	0.0266276	0.216486	0.498792	0.0961925	0.035079	0.0488312	0.0193019	0.0191217
RM42_50	BM3	2	1300	50	1			SPINEL
						INGV	326	RM42_50_cx 1	0.1353	0.5008	45.51	27.26	0.1013	24.44	0.2906				0.0558	0.1957	98.4895
						INGV	327	RM42_50_cx 2	0.0735	0.4871	46.56	26.69	0.1177	23.89	0.3317				0.249	0.1423	98.5413
						INGV	328	RM42_50_cx 3	0.0643	0.5932	44.78	27.13	0.1243	24.3	0.2014				0.1885	0.2251	97.6068
						INGV	332	RM42_50_cx 7	0.5249	0.6063	45.41	27.16	0.1504	24.53	0.7871				0.3195	0.2115	99.6997
						INGV	334	RM42_50_cx 9	0.1187	0.5525	46.13	26.45	0.0699	24.67	0.545				1.4407	0.1463	100.123
						INGV	335	RM42_50_cx 10	0.5337	0.5981	45.83	26.03	0.1262	25.07	0.7833				1.3831	0.2365	100.591
								average	0.241733	0.556333	45.7033	26.7867	0.114967	24.4833	0.48985				0.6061	0.1929	99.1752
								standard deviation	0.224356	0.0519465	0.617727	0.485084	0.0271811	0.392105	0.255119				0.630423	0.0400588
RM45_50	BM3	2	1300	50	4			SPINEL
						INGV	135	RM45_50_cx 1	0.6513	0.6057	44.72	23.08	0.1076	24.61	0.7321				4.47	0.1748	99.1515
						INGV	136	RM45_50_cx 2	0.2161	0.3681	48.54	20.81	0.111	25.88	0.4518				3.75	0.0827	100.21
						INGV	139	RM45_50_cx 5	0.1684	0.4358	48.07	22.65	0.1156	25.13	0.348				2.66	0.0862	99.664
						INGV	141	RM45_50_cx 7	0.9794	0.4371	47.3	21.48	0.1743	24.79	1.5				1.99	0.109	98.7598
						INGV	145	RM45_50_cx 11	0.6925	0.4234	47.94	20.97	0.1766	24.68	0.9577				2.48	0.048	98.3682
						INGV	146	RM45_50_cx 12	0.136	0.4184	49.1	21.52	0.1487	24.77	0.2794				2.17	0.0563	98.5988
								average	0.47395	0.448083	47.6117	21.7517	0.138967	24.9767	0.7115				2.92	0.0928333	99.1253
								standard deviation	0.348928	0.0812431	1.53972	0.916153	0.0318479	0.477396	0.462398				0.977753	0.0457631			Fo	Fa	La	Tp
BM1						Natural olivine		1 stred	40.55			9.95	0.21	48.05	0.18					0.39	99.33		89.1805	10.358	0.240074	0.221416
						Natural olivine		1 okraj	39.86			13.7	0.34	44.6	0.88					0.02	99.39		83.9771	14.4685	1.19071	0.363679
						Natural olivine		2 stred	40.63			11.14	0.15	47.6	0.22					0.25	100		87.9988	11.5514	0.292274	0.157534
						Natural olivine		2 okraj	39.97			14.22	0.31	44.9	0.62					0.14	100.16		83.9291	14.9089	0.832828	0.329186
						Natural olivine		3 stred	41.03			9.45	0.18	49.17	0.26					0.11	100.2		89.7926	9.67945	0.341201	0.186735
						Natural olivine		3 okraj	40.07			14.02	0.27	44.78	0.88					0.07	100.09		83.8115	14.7179	1.18358	0.287076
						Natural olivine		3 Fe bohatsi lem	37.76			26.9	0.9	33.45	1.42					0.02	100.44		66.8069	30.1339	2.03803	1.02113
						Natural olivine		2 Fe bohatsi lem	36.55			31.65	1.23	29.5	1.32					0.1	100.36		60.3278	36.3034	1.93984	1.42894
						Natural olivine		4 stred	40.87			10.11	0.18	48.72	0.18					0.36	100.41		89.1945	10.3815	0.23681	0.187205
						Natural olivine		4 okraj	39.75			15.04	0.36	43.74	1.26					0.05	100.2		82.0857	15.8312	1.69925	0.3838
						Natural olivine		4 Fe bohatsi lem	36.06			32.77	1.23	28.17	1.61					0.07	99.9		58.1951	37.9712	2.39014	1.44351
						Natural olivine		5 stred	40.46			12.27	0.21	47.19	0.12					0.22	100.48		86.9418	12.6795	0.158876	0.219792
						Natural olivine		5 okraj	39.99			14.45	0.4	44.43	0.9					0.19	100.36		83.1884	15.1751	1.21095	0.425462
						Natural olivine		5 Fe bohatsi lem	37.08			28.96	1.12	31.48	1.86					0.13	100.63		63.3448	32.6853	2.68959	1.28029
								Average	39.3307			17.4736	0.506429	41.8414	0.836429					0.151429	100.139		79.1982	19.0604	1.17458	0.56684
								1 s	1.63698			8.23737	0.400831	7.33989	0.569581					0.113191	0.370453		10.7768	9.59882	0.806436	0.458444
BM2						Natural olivine		BM2 Ol pheno rim circle 1	39.744		0.032	12.356	0.359	46.83	0.725					0.112	100.158		85.9498	12.7197	0.956215	0.374308
						Natural olivine		BM2 same ol pheno mantle circle 1	39.174		0.009	18.937	0.456	41.705	0.092					0.013	100.386		79.2091	20.1733	0.125566	0.492001
						Natural olivine		BM2 same ol pheno core circle 1	38.232		0.027	19.007	0.498	41.737	0.076					0	99.577		79.1442	20.2157	0.103564	0.536465
						Natural olivine		BM2 ol pheno rim circle 2	39.671		0.033	10.639	0.173	47.761	0.22					0.189	98.686		88.4714	11.0537	0.292853	0.182049
						Natural olivine		BM2 same ol pheno core circle 2	39.891		0.031	11.187	0.208	47.884	0.203					0.251	99.655		87.9853	11.5295	0.268048	0.217119
						Natural olivine		BM2 ol pheno rim circle 3	39.836		0.016	14.315	0.511	45.722	0.079					0	100.479		84.5167	14.8418	0.10494	0.536601
						Natural olivine		BM2 same ol pheno mantle circle 3	40.02		0	14.229	0.512	45.179	0.07					0.01	100.02		84.445	14.9173	0.0940227	0.543652
						Natural olivine		BM2 same ol pheno core circle 3	39.14		0	14.43	0.599	45.092	0.042					0	99.303		84.1958	15.1125	0.0563556	0.635377
						Natural olivine		BM2 ol pheno rim circle 4	39.656		0.015	10.431	0.202	48.573	0.185					0.388	99.45		88.8454	10.7015	0.243169	0.209897
						Natural olivine		BM2 same ol pheno mantle circle 4	41.06		0.014	10.497	0.163	48.445	0.11					0.396	100.685		88.8829	10.8022	0.14503	0.169891
						Natural olivine		BM2 same ol pheno core circle 4	40.994		0.006	10.395	0.236	48.26	0.169					0.348	100.408		88.8014	10.7284	0.223469	0.246694
						Natural olivine		BM2 ol pheno rim circle 5	39.93		0.047	10.877	0.4	47.718	1.034					0.068	100.074		87.094	11.1351	1.3562	0.414744
						Natural olivine		BM2 same ol pheno mantle circle 5	38.234		0.004	18.716	0.595	41.839	0.069					0.197	99.654		79.3544	19.9105	0.094045	0.641092
						Natural olivine		BM2 same ol pheno core circle 5	39.271		0	18.983	0.499	41.527	0.066					0.228	100.574		79.0911	20.2787	0.0903312	0.539898
								Average	39.6324		0.0167143	13.9285	0.3865	45.5909	0.224286					0.157143	99.9364		84.7133	14.58	0.296701	0.409985
								1 s	0.790726		0.0144194	3.44808	0.154648	2.68822	0.279193					0.143851	0.550993		3.8286	3.83237	0.366004	0.16744
BM3						Natural olivine		BM3 ol pheno rim circle 1	37.409		0.019	25.177	0.717	35.956	0.442					0.126	99.846		70.7761	27.797	0.625222	0.801767
						Natural olivine		BM3 same ol pheno mantle circle 1	40.322		0.014	12.859	0.215	46.347	0.213					0.197	100.167		86.0913	13.3975	0.284325	0.226877
						Natural olivine		BM3 ol pheno core circle 1	39.928		0.03	12.386	0.189	46.559	0.259					0.247	99.598		86.5414	12.9131	0.345953	0.19957
						Natural olivine		BM3 ol pheno rim circle 2	38.568		0.013	19.543	0.367	40.997	0.355					0.157	100		78.2056	20.9101	0.486644	0.397709
						Natural olivine		BM3 same ol pheno mantle circle 2	40.508		0.037	12.929	0.202	46.502	0.216					0.23	100.624		86.077	13.4233	0.28732	0.212413
						Natural olivine		BM3 same ol pheno core circle 2	40.467		0.023	13.561	0.221	46.207	0.2					0.289	100.968		85.438	14.0641	0.265748	0.23214
						Natural olivine		BM3 ol macropheno rim circle 2	37.077		0.007	25.663	0.651	35.854	0.43					0.112	99.794		70.4028	28.2643	0.606761	0.726185
						Natural olivine		BM3 same ol macropheno mantle circle 2	40.872		0.024	12.084	0.257	46.42	0.254					0.338	100.249		86.7237	12.6626	0.341007	0.272759
						Natural olivine		BM3 same ol macropheno core circle 2	39.714		0.022	12.215	0.197	47.095	0.257					0.311	99.811		86.8225	12.6307	0.340477	0.206318
						Natural olivine		BM3 ol pheno rim circle 3	38.412		0.073	22.302	0.526	38.981	0.262					0.174	100.73		74.9965	24.0664	0.362232	0.574894
						Natural olivine		BM3 same ol pheno mantle circle 3	40.026		0.033	12.508	0.209	46.82	0.23					0.238	100.064		86.512	12.9632	0.305401	0.219384
						Natural olivine		BM3 same ol pheno core circle 3	39.899		0.05	12.741	0.296	46.81	0.245					0.187	100.228		86.2054	13.1607	0.324234	0.309672
						Natural olivine		BM3 ol pheno rim circle 3bis	40.05		0.039	12.772	0.188	46.215	0.232					0.236	99.732		86.1381	13.3521	0.31074	0.19906
						Natural olivine		BM3 same ol pheno core circle 3bis	40.65		0.037	12.454	0.133	46.949	0.269					0.342	100.834		86.6167	12.8873	0.356635	0.139393
						Natural olivine		BM3 ol pheno rim circle 3tris	38.514		0.018	22.615	0.627	37.731	0.414					0.128	100.047		73.882	24.8379	0.582556	0.697464
						Natural olivine		BM3 same ol pheno mantle circle 3tris	39.622		0.03	12.646	0.27	46.63	0.238					0.266	99.702		86.2761	13.1237	0.316445	0.283794
						Natural olivine		BM3 same ol pheno core circle 3tris	39.664		0.063	12.274	0.23	46.692	0.212					0.29	99.425		86.6924	12.7821	0.28286	0.242594
								Average	39.5119		0.0312941	15.6899	0.323235	44.045	0.278118					0.227529	100.107		82.6116	16.6609	0.377915	0.349529
								1 s	1.08753		0.017125	4.91631	0.180324	4.10721	0.0773676					0.0711164	0.43812		5.99814	5.69432	0.115486	0.205534

## Sheet: Original glasses
Experiment	Sample	Run (h)	EMP	No.	Comment	SiO2	TiO2	Al2O3	FeO	MnO	MgO	CaO	Na2O	K2O	P2O5	Cr2O3	NiO	PtO	Total
	Pristine glass BM1
		6	DST		BM1_1_1	39.302	0.203	16.281	10.054	0	13.8	2.676	2.916	1.731	0.806	0	0	0	87.769
		6	DST		BM1_1_2	39.31	0.189	16.11	10.208	0	13.665	2.462	2.863	1.666	0.946	0	0	0	87.419
		6	DST		BM1_1_3	38.598	0.181	16.147	10.363	0	13.927	2.342	2.92	1.769	0.861	0	0	0	87.108
		6	DST		BM1_2_1	38.706	0.193	16.045	10.31	0	13.963	2.507	2.9	1.707	0.859	0	0	0	87.19
		6	DST		BM1_2_2	38.269	0.151	16.226	10.321	0	13.812	2.641	2.803	1.753	0.856	0	0	0	86.832
		6	DST		BM1_1	40.06	3.01	9.72	9.49289	0.1099	15.98	13.38	2.84	1.73	1.059	0.0524	0.042	0	97.4762
		6	DST		BM1_2	39.85	3.05	9.47	9.52888	0.1903	15.75	13.42	3.02	1.81	1.0481	0.0554	0.0218	0	97.2145
		6	DST		BM1_3	39.99	2.98	9.67	9.54688	0.1766	16.06	13.21	2.85	1.64	1.1663	0.0862	0.0495	0	97.4255
		6	DST		BM1_4	40.08	2.76	9.63	9.51988	0.1225	15.75	13.45	2.76	1.83	1.1744	0.0076	0.0438	0	97.1282
		6	DST		BM1_1_4	40.21	3.33	9.76	9.65485	0.2996	15.76	13.41	2.79	1.59	1.1188	0.0659	0.0245	0	98.0137
		6	DST		BM1_1_5	40.66	3.2	9.63	9.71784	0.2028	15.94	13.58	2.84	1.69	1.0218	0.0302	0.0184	0	98.531
		6	DST		BM1_1_6	40.47	2.73	9.76	9.8978	0.1457	15.73	13.07	3.06	1.7	1.0745	0.071	0.1144	0	97.8234
		6	DST		BM1_1_7	39.69	3.19	9.65	9.59187	0.1669	15.92	13.29	2.98	1.8	1.0513	0.0806	0.0306	0	97.4413
		6	DST		BM1_1_8	39.89	3.06	9.65	9.59187	0.1818	15.98	13.4	2.92	1.71	1.0819	0.0108	0.0896	0	97.566
		6	DST		BM1_1_9	40.42	2.74	9.7	9.55588	0.2142	15.71	13.2	2.83	1.75	1.1103	0.0971	0.0508	0	97.3783
		6	DST		BM1_1_10	40.02	2.68	9.63	9.40291	0.1398	15.77	13.58	2.8	1.79	1.0046	0.1082	0.0848	0	97.0103
		6	DST		BM1_1_11	40	2.99	9.62	9.57387	0.2049	15.89	13.44	2.88	1.87	1.1375	0.0857	0.0588	0	97.7508
		6	DST		BM1_1_12	40.35	3.01	9.61	9.4569	0.1963	16.06	13.59	2.95	1.7	1.0634	0.0335	0.093	0	98.1131
		6	DST		BM1_1_13	39.68	3.09	9.75	9.78083	0.1662	16.25	13.47	2.91	1.71	1.0638	0.1331	0	0	98.0039
		6	DST		BM1_1_14	40.18	2.69	9.85	9.55588	0.1775	15.91	13.69	2.96	1.66	1.0518	0.0407	0.112	0	97.8779
		6	DST		BM1_1_15	39.92	2.93	9.8	9.76283	0.1331	16.1	13.54	2.83	1.72	1.0357	0.0524	0.0345	0	97.8585
		6	DST		BM1_1_16	40	2.97	9.72	9.77183	0.1457	15.88	13.02	2.87	1.71	1.0905	0.1121	0.0194	0	97.3095
		6	DST		BM1_2_3	40.01	3.06	9.72	10.71	0.1876	16.2	13.27	2.97	1.78	1.0477	0.0674	0	0	99.0227
		6	DST		BM1_2_4	39.7	3.17	9.59	10.41	0.1513	16.08	13.35	2.94	1.79	1.1373	0.1567	0.0568	0	98.5321
		6	DST		BM1_2_5	39.96	3.08	9.6	10.62	0.1432	15.84	13.29	2.78	1.82	1.1483	0.0838	0.0773	0	98.4426
		6	DST		BM1_2_6	40.37	3	9.48	10.66	0.1424	15.89	13.46	2.89	1.74	1.2032	0.0559	0.0333	0	98.9248
		6	DST		BM1_2_7	40.3	3.09	9.86	10.83	0.1968	15.97	13.62	2.88	1.65	1.1355	0.1206	0.0546	0	99.7075
		6	DST		BM1_2_8	39.99	2.98	9.58	10.68	0.1693	16.13	13.25	2.83	1.7	1.0519	0.0264	0.0896	0	98.4772
		6	DST		BM1_2_9	40.29	2.98	9.56	10.63	0.095	15.81	13.55	2.85	1.66	1.0617	0.0453	0.0461	0	98.5781
		6	DST		BM1_2_10	40.24	3	9.72	10.84	0.1792	16.03	13.41	2.82	1.72	1.1243	0.0992	0	0	99.1827
		6	DST		BM1_2_11	40.62	3.22	9.55	10.7	0.1308	15.99	13.45	2.93	1.66	1.125	0.0358	0.0633	0	99.4749
					average	40.1135	2.99962	9.66462	9.98014	0.168054	15.9377	13.3996	2.88385	1.72808	1.09187	0.0697692	0.0503423	0	98.0871
					standard deviation	0.26773	0.167152	0.100369	0.531674	0.0408604	0.149085	0.165783	0.0761092	0.0674103	0.0512182	0.0377348	0.0329522	0	0.747868
	Pristine glass BM2
			INGV	5	BM2_1_cx1_1	32.63	2.47	7.44	11.16	0.1964	18.03	22.92	0.9134	0.8138	1.7702	0.0621	0.0136	0	98.4196
			INGV	6	BM2_1_cx1_2	32.92	2.37	7.6	10.76	0.2163	18.06	23.06	1.1662	0.722	1.6963	0.0495	0.0273	0.0357	98.6833
			INGV	7	BM2_1_cx1_3	32.51	2.49	7.52	11.07	0.2272	18.17	23.22	1.1213	0.8118	1.69	0.037	0.017	0.0355	98.9199
			INGV	8	BM2_1_cx1_4	33.32	2.32	7.74	10.9	0.2235	18.25	23.15	1.0634	0.7008	1.4849	0.0392	0.0192	0	99.2111
			INGV	9	BM2_1_cx1_5	32.89	2.41	7.51	10.7	0.2516	18.05	22.63	0.9218	0.7175	1.7257	0	0.0577	0.5145	98.3789
			INGV	10	BM2_1_cx1_6	32.8	2.41	7.71	11.03	0.2134	18.22	22.73	1.0807	0.7667	1.6642	0.0589	0.0302	0.3457	99.0599
			INGV	11	BM2_1_cx2_1	33.13	2.48	7.8	10.88	0.2613	18.17	22.93	1.0748	0.782	1.7533	0	0.0555	0.3656	99.6826
			INGV	12	BM2_1_cx2_2	33.24	2.5	7.52	10.85	0.1874	18.19	22.87	1.1016	0.7662	1.4587	0	0.0466	0.1994	98.93
			INGV	13	BM2_1_cx2_3	32.88	2.58	7.58	11.1	0.2045	18.06	22.83	1.1547	0.8164	1.7396	0	0.0368	0	98.9821
			INGV	14	BM2_1_cx2_4	33.02	2.47	7.76	10.75	0.1391	18.38	23.3	0.9596	0.7934	1.6894	0.062	0.0215	0.1039	99.4489
			INGV	15	BM2_1_cx2_5	33.31	2.49	7.58	10.72	0.1797	18.41	23.1	1.1663	0.8378	1.6296	0.0394	0	0.3083	99.7712
			INGV	16	BM2_1_cx2_6	33.36	2.42	7.47	10.85	0.1944	18.29	23.01	1.1245	0.8026	1.4314	0.0585	0.0395	0	99.0509
			INGV	17	BM2_2_cx1_1	32.96	2.4	7.82	11.32	0.2228	18.19	22.36	0.9901	0.65	1.7079	0.1052	0.0101	0	98.7362
			INGV	18	BM2_2_cx1_2	32.67	2.35	7.85	11.15	0.2947	18.26	22.82	1.1907	0.7112	1.5366	0.0784	0.0394	0.4054	99.3565
			INGV	19	BM2_2_cx1_3	33.06	2.4	7.8	11.47	0.2299	18.14	22.58	1.0086	0.6622	1.9093	0.0922	0.0264	0	99.3787
			INGV	20	BM2_2_cx1_4	32.57	2.39	7.55	11.14	0.2088	18.25	22.77	1.0438	0.6816	1.6661	0.0575	0.0787	0	98.4066
			INGV	21	BM2_2_cx2_1	31.93	2.53	7.85	11.35	0.2139	18.26	23.02	1.0775	0.713	1.655	0.1164	0.0749	0	98.7907
			INGV	22	BM2_2_cx2_2	32.54	2.4	7.86	11.42	0.1918	18.26	22.61	1.0232	0.6939	1.9966	0.0941	0.0466	0	99.1363
			INGV	23	BM2_2_cx2_3	32.43	2.47	7.96	11.51	0.2398	18.28	22.56	1.2271	0.7621	1.6383	0.0757	0.0329	0	99.1859
			INGV	24	BM2_2_cx2_4	32.52	2.49	7.86	11.44	0.1793	18.11	22.26	1.0254	0.7265	1.5679	0.1131	0.0174	0	98.3097
			INGV	25	BM2_3_cx1_1	33.04	2.36	7.38	11.23	0.1722	18.17	22.91	0.8892	0.7013	1.8049	0.0437	0.0642	0.016	98.7816
			INGV	26	BM2_3_cx1_2	33.03	2.4	7.46	11.22	0.273	18.11	22.73	0.9472	0.7758	1.6604	0.057	0	0	98.6635
			INGV	27	BM2_3_cx1_3	32.51	2.41	7.69	10.89	0.2325	18.28	22.76	1.0531	0.7431	1.5776	0.0821	0.0282	0	98.2567
			INGV	28	BM2_3_cx1_4	33.23	2.39	7.84	11.34	0.1729	18.24	22.81	1.0945	0.6369	1.6432	0.0533	0.0936	0	99.5444
			INGV	29	BM2_3_cx1_5	32.47	2.39	7.72	11.08	0.2252	18.56	22.74	1.1483	0.6802	1.7196	0.0587	0.0709	0	98.8629
			INGV	30	BM2_3_cx1_6	32.84	2.5	7.62	11.18	0.223	18.1	22.96	1.0445	0.7552	1.4111	0.0321	0.0137	0	98.6797
			INGV	31	BM2_3_cx2_1	33.32	2.49	7.76	11.41	0.2204	18.47	22.55	1.1738	0.7057	1.6297	0.0368	0.0322	0	99.7986
			INGV	32	BM2_3_cx2_2	32.03	2.37	7.6	11.33	0.2321	18.24	23.06	1.1094	0.7158	1.8194	0.0757	0.0454	0	98.6279
			INGV	33	BM2_3_cx2_3	33.2	2.47	7.71	11.16	0.2495	18.51	22.74	0.9635	0.764	1.6798	0.0687	0.0191	0	99.5347
			INGV	34	BM2_3_cx2_4	32.83	2.27	7.64	11.08	0.2442	17.95	22.66	0.9837	0.6927	1.6022	0.0793	0.0778	0.293	98.4029
			INGV	35	BM2_3_cx2_5	32.87	2.62	7.97	11.29	0.2494	18.28	22.43	1.0834	0.6941	1.6575	0.0827	0.0352	0	99.2624
			INGV	36	BM2_3_cx2_6	32.83	2.44	7.52	11.16	0.2178	18.42	23.15	0.9283	0.7263	1.6356	0.0187	0.0176	0	99.0644
					average	32.8403	2.43594	7.67781	11.1231	0.218375	18.23	22.8197	1.05792	0.735081	1.66413	0.057125	0.0371625	0.0819688	98.9787
					standard deviation	0.359556	0.0733027	0.158577	0.23546	0.0321759	0.14224	0.250593	0.0893757	0.0519128	0.125034	0.031887	0.0240515	0.150426	0.44073
	Pristine glass BM3
		2	INGV	37	BM3_2h_cx1_1	45.38	2.13	10.92	10.92	0.194	16.86	10.12	2.52	0.9614	0.5759	0.1214	0.0788	0.0874	100.869
			INGV	38	BM3_2h_cx1_2	44.75	1.96	10.75	10.63	0.1961	16.8	10.09	2.47	0.9589	0.6227	0.235	0.0778	0	99.5406
			INGV	39	BM3_2h_cx1_3	44.77	1.93	10.69	10.83	0.1963	16.9	10.24	2.47	1.0357	0.7585	0.141	0.0518	0	100.013
			INGV	40	BM3_2h_cx2_1	45.56	2.04	10.74	10.6	0.0715	16.79	10.12	2.46	0.9339	0.6304	0.1251	0.0517	0	100.123
			INGV	41	BM3_2h_cx2_2	45.29	1.93	10.93	10.79	0.2014	16.67	10.34	2.35	0.9956	0.5938	0.1674	0.0566	0	100.315
			INGV	42	BM3_2h_cx2_3	45.2	2.01	10.84	10.73	0.187	16.79	10.2	2.36	1.0451	0.5618	0.1528	0.0341	0	100.111
					average	45.1583	2	10.8117	10.75	0.174383	16.8017	10.185	2.43833	0.988433	0.62385	0.157117	0.0584667	0.0145667	100.162
					standard deviation	0.330782	0.0774597	0.100283	0.12182	0.0506178	0.0783369	0.0946044	0.0679461	0.0448854	0.0710313	0.0418346	0.0171737	0.0356809	0.432522
		4	INGV	43	BM3_4h_cx1_1	44.77	2.02	10.69	10.6	0.1983	16.98	10.2	2.54	0.9412	0.6199	0.0991	0.0638	0.2766	99.999
			INGV	44	BM3_4h_cx1_2	44.97	2.04	10.91	10.8	0.1775	16.94	10.29	2.54	1.0805	0.6693	0.0928	0.0244	0	100.534
			INGV	45	BM3_4h_cx1_3	44.78	2.05	10.8	10.65	0.1461	17.31	10.55	2.44	0.968	0.6247	0.0621	0.0549	0.0717	100.507
			INGV	46	BM3_4h_cx2_1	45.21	1.92	10.93	10.67	0.2278	16.51	10.32	2.41	1.0508	0.6966	0.1853	0.0466	0	100.177
			INGV	47	BM3_4h_cx2_2	44.64	1.95	10.73	10.62	0.2233	16.98	10.27	2.25	1.0458	0.7092	0.0624	0.0487	0	99.5294
			INGV	48	BM3_4h_cx2_3	44.66	1.99	10.93	10.87	0.2276	16.76	10.23	2.39	1.1123	0.6831	0.1611	0.0383	0.1099	100.162
					average	44.8383	1.995	10.8317	10.7017	0.2001	16.9133	10.31	2.42833	1.0331	0.667133	0.110467	0.0461167	0.0763667	100.152
					standard deviation	0.216649	0.051672	0.106661	0.108336	0.0331415	0.265757	0.12506	0.108336	0.0658447	0.0372266	0.0514875	0.0136343	0.108384	0.369967
		6	INGV	49	BM3_6h_cx1_1	44.87	2.02	10.61	10.74	0.1098	17.1	10.43	2.62	1.0284	0.633	0.1298	0.0503	0	100.341
			INGV	50	BM3_6h_cx1_2	44.88	1.95	10.77	10.41	0.1823	16.61	9.89	2.56	0.9458	0.7806	0.1179	0.0738	0	99.1704
			INGV	51	BM3_6h_cx1_3	44.8	1.97	10.61	10.67	0.1363	16.94	10.25	2.58	0.9941	0.673	0.1212	0.0412	0	99.7859
			INGV	52	BM3_6h_cx1_4	45.56	2.02	11.03	10.88	0.184	16.89	10.19	2.41	0.9905	0.8374	0.1494	0.0353	0	101.177
			INGV	53	BM3_6h_cx1_5	44.41	2.07	11.1	10.69	0.225	16.63	10.25	2.39	0.9516	0.7609	0.1119	0.0802	0.1835	99.8531
			INGV	54	BM3_6h_cx1_6	44.69	1.92	10.73	10.74	0.1604	17	10	2.47	1.0044	0.7146	0.1301	0.0266	0.0337	99.6199
			INGV	55	BM3_6h_cx2_1	44.94	2.1	10.67	10.51	0.2512	16.47	10.34	2.38	0.9353	0.6064	0.0875	0.0524	0	99.3428
			INGV	56	BM3_6h_cx2_2	45.12	2.03	10.66	10.59	0.1512	16.9	10.14	2.56	1.0549	0.6775	0.099	0.029	0	100.011
			INGV	57	BM3_6h_cx2_3	45.11	1.94	10.69	10.79	0.1493	16.84	10.27	2.53	0.9585	0.6867	0.0854	0.0265	0	100.076
			INGV	58	BM3_6h_cx2_4	44.89	2.07	10.88	10.8	0.173	16.88	10.15	2.51	0.9569	0.6875	0.0592	0.0403	0	100.097
			INGV	59	BM3_6h_cx2_5	45.53	1.97	10.92	10.81	0.1964	16.73	10.15	2.29	0.9294	0.5493	0.0897	0.0816	0	100.246
			INGV	60	BM3_6h_cx2_6	45.03	1.92	10.87	10.64	0.2347	16.74	10.26	2.58	0.9409	0.6388	0.1052	0.0852	0	100.045
			INGV	61	BM3_6h_cx2_7	44.83	2	10.76	10.81	0.2393	17.07	10.23	2.48	1.0161	0.6717	0.1514	0.0578	0	100.316
			INGV	62	BM3_6h_cx2_8	45.22	1.98	10.87	10.7	0.2063	16.82	9.69	2.38	1.0083	0.7007	0.0758	0.0877	0.0725	99.8114
					average	44.9914	1.99714	10.7979	10.6986	0.185657	16.83	10.16	2.48143	0.97965	0.687007	0.108107	0.05485	0.0206929	99.9924
					standard deviation	0.307518	0.0571676	0.152324	0.128534	0.0422263	0.179486	0.19002	0.0980469	0.0392416	0.0728588	0.027205	0.0228762	0.0511931	0.484008
					Average 4-6 h exp.	44.9455	1.9965	10.808	10.6995	0.18999	16.855	10.205	2.4655	0.995685	0.681045	0.108815	0.05223	0.037395	100.04
					St. Dev. 4-6 h exp.	0.279508	0.0528465	0.134781	0.116939	0.0384367	0.200137	0.179179	0.0988673	0.0518147	0.0622886	0.0338376	0.0200661	0.0727403	0.437964

## Sheet: Data for plots
Run#	Experiment details	Cc added (wt%)	SiO2	TiO2	Al2O3	FeO	MnO	MgO	CaO	Na2O	K2O	P2O5	Total	CO2(100-tot)	CaO/Al2O3	Mg#
BM1	Average	0	40.1135	2.99962	9.66462	9.98014	0.168054	15.9377	13.3996	2.88385	1.72808	1.09187	98.0871	1.9129		0.751052
BM1	1100 - 10	10	38.8727	2.54225	10.9445	7.57425	0.18325	5.88225	22.933	3.89625	2.65525	1.24975	96.7335	3.2665		0.594675
BM1	1100 - 30	30	31.2495	1.238	6.7285	4.292	0.122	2.9235	29.535	3.604	3.5125	1.928	85.133	14.867		0.56271
BM1	1100 - 50	50	29.49	1.2294	3.98	2.05154	0.1378	4.57	40.4	3.36	2.08	0.7328	88.0315	11.9685		0.807999
BM1	Average	0	40.1135	2.99962	9.66462	9.98014	0.168054	15.9377	13.3996	2.88385	1.72808	1.09187	98.0871	1.9129	1.38646	0.751052
BM1	1200 - 10	10	37.1946	2.77136	9.69327	8.80245	0.156091	10.8823	20.2032	2.90836	1.82036	1.13245	95.5645	4.43555	2.08425	0.700199
BM1	1200 - 30	30	33.2068	2.43256	7.89033	6.90844	0.140778	11.3312	26.5587	2.41711	1.55144	0.984111	93.4214	6.57856	3.36598	0.756016
BM1	1200 - 50	50	29.3406	2.1524	5.9117	5.4761	0.129	10.4561	31.325	2.1868	1.362	0.8899	89.2296	10.7704	5.29881	0.782949
BM1	Average	0	40.1135	2.99962	9.66462	9.98014	0.168054	15.9377	13.3996	2.88385	1.72808	1.09187	98.6833	1.3167	1.38646	0.751052
BM1	1300 - 10	10	37.3958	2.55069	8.95438	9.29662	0.153	14.2592	18.6116	2.61785	1.64623	1.03192	96.5173	3.48269	2.07849	0.743434
BM1	1300 - 30	30	33.2592	2.27943	7.70693	7.60179	0.136571	12.6736	25.8771	2.40893	1.47107	0.9985	94.4131	5.58686	3.35764	0.759014
BM1	1300 - 50	50	29.7755	1.99994	6.88241	6.41582	0.137471	11.5414	30.5155	2.10859	1.30141	0.888294	91.5664	8.43359	4.43384	0.772646
BM2	Average	0	32.8403	2.43594	7.67781	11.1231	0.218375	18.23	22.8197	1.05792	0.735081	1.66413	98.9787	1.02129	2.97216	0.755873
BM2	1200 - 10	10	30.704	2.4994	6.556	6.4382	0.1914	10.7982	30.1566	1.231	0.7836	1.9922	91.3506	8.6494	4.59985	0.760108
BM2	1200 - 30	30	21.6906	1.74675	2.82613	3.1455	0.177125	8.21488	38.7963	1.6405	1.147	2.25313	81.6379	18.3621	13.7277	0.831475
BM2	1200 - 50	50	15.6226	1.44615	1.62054	2.40277	0.115308	6.91723	43.5841	1.04854	0.811385	1.33531	74.9039	25.0961	26.8948	0.844688
BM2	Average	0	32.8403	2.43594	7.67781	11.1231	0.218375	18.23	22.8197	1.05792	0.735081	1.66413	98.9787	1.02129	2.97216	0.755873
BM2	1300 - 10	10	30.1269	2.17286	6.09671	7.71043	0.19	14.3919	29.1854	1.00586	0.687	1.56957	93.1366	6.86343	4.78708	0.779065
BM2	1300 - 30	30	24.7857	1.6688	3.9755	5.1094	0.1539	12.075	36.2502	0.7867	0.5098	1.2771	86.5921	13.4079	9.1184	0.817006
BM2	1300 - 50	50	17.8328	1.22589	1.99322	2.97467	0.115222	8.42456	43.3746	0.531667	0.368	0.964778	77.8053	22.1947	21.761	0.842528
BM3	Average	0	44.9455	1.9965	10.808	10.6995	0.18999	16.855	10.205	2.4655	0.995685	0.681045	100.04	-0.04014		0.748493
BM3	1100 - 10	10	44.58	2.22	10.05	7.815	0.0946	11.905	20.81	1.2394	0.3217	0.4697	99.5054	0.4946		0.742127
BM3	1100 - 30	30	42.38	0.1705	6.15	2.03	0.05295	12.595	33.79	0.50535	0.27835	0.2095	98.1617	1.83835		0.921391
BM3	1100 - 50	50	16.51	1.52463	2.19	2.235	0.1155	6.0125	43.47	1.845	0.9407	0.7287	75.572	24.428		0.835585
BM3	Average	0	44.9455	1.9965	10.808	10.6995	0.18999	16.855	10.205	2.4655	0.995685	0.681045	100.04		0.944208	0.748493
BM3	1200 - 10	10	42.6288	2.0018	10.922	8.6902	0.1772	11.4098	17.9524	2.4382	0.9648	0.5956	97.7808	2.2192	1.64369	0.712676
BM3	1200 - 30	30	35.759	1.52086	8.31186	6.47871	0.144857	11.4526	28.1961	1.88386	0.784571	0.505	95.0374	4.96257	3.39228	0.769561
BM3	1200 - 50	50	26.0967	1.08517	5.13033	3.156	0.0721667	8.94383	38.6908	1.32867	0.537167	0.359333	85.4002	14.5998	7.54158	0.842613
BM3	Average	0	44.9455	1.9965	10.808	10.6995	0.18999	16.855	10.205	2.4655	0.995685	0.681045	100.04	3.2665	0.944208	0.748493
BM3	1300 - 10	10	41.7374	1.8892	10.6536	9.3902	0.1526	12.438	16.9372	2.31	0.9588	0.539	97.006	2.994	1.58981	0.714477
BM3	1300 - 30	30	35.8513	1.4785	8.1915	7.082	0.1155	12.9258	27.2697	1.852	0.733333	0.438	95.9377	4.06233	3.32902	0.775183
BM3	1300 - 50	50	26.8482	1.08233	5.74033	4.67167	0.09	9.41417	37.8982	1.32567	0.501167	0.348	87.9197	12.0803	6.60208	0.79197
Mollo et al., 2010 (Lithos, 114, 503-514)
14	1300 °C + 5% Cc + 1% H2O @ 5 kb	5	46.1697	0.670412	10.8646	6.55624		13.8026	16.2378	1.1535	3.1253		98.5801	1.41986	1.49456	0.799084
13	1300° C + 10% Cc + 1% H2O @ 5 kb	10	44.7592	0.63648	10.6243	6.0025		11.8483	20.0442	1.0967	2.90822		97.92	2.08	1.88664	0.788541
10	1300 °C + 20% Cc + 1% H2O @ 5 kb	20	42.3852	0.593957	9.8149	5.8422		11.0515	23.8557	1.03212	2.78478		97.3603	2.63974	2.43056	0.781358
2	1200° C + 1% H2O @ 5 kb	0	47.9219	0.702261	11.3944	7.31934		13.1155	13.9958	1.2067	3.25414		98.91	1.09	1.2283	0.77196
6	1200° C + 5% Cc + 1% H2O @ 5 kb	5	46.2442	0.743508	14.3908	6.94593		7.04376	13.6962	2.51423	6.24155		97.8202	2.17978	0.951734	0.657039
15	1200 °C + 10% Cc + 1% H2O @ 5 kb	10	42.9826	0.669783	13.5898	6.7949		6.21248	18.1618	2.25202	6.40662		97.07	2.93	1.33643	0.63333
5	1200° C + 20% Cc + 1% H2O @ 5 kb	20	36.2807	0.642731	13.4782	6.7151		5.18022	23.8866	2.76278	6.9837		95.93	4.07	1.77224	0.59306
9	1150 °C + 1% H2O @ 5 kb	0	50.0047	0.68607	18.6219	7.25274		3.9008	6.95871	2.9403	3.22453		93.5897	6.41025	0.373684	0.503985
8	1150 °C + 5% Cc + 1% H2O @ 5 kb	5	45.5978	0.650704	19.4046	6.99264		5.14736	6.99264	2.97187	9.36237		97.12	2.88	0.36036	0.581702
12	1150 °C + 10% Cc + 1% H2O @ 5 kb	10	41.4219	0.732108	15.4513	6.7431		4.72017	14.5555	3.33302	9.28621		96.2433	3.7567	0.94202	0.569415
7	1150 °C + 20% Cc + 1% H2O @ 5 kb	20	29.0594	0.759294	11.3988	7.59294		5.34318	25.1504	3.56212	10.8738		93.74	6.26	2.20641	0.570708
Iacono Marziano et al., 2008 (Contrib. Mineral. Petrol., 155, 719-738)
#2-1	1150 °C + 0% Cc, 0.1 MPa	0	54.0297	0.927675	15.8388	5.54652		4.8532	8.83732	2.80256	3.92553	0.888615	97.65	2.35	0.557953	0.623072
#2-2	1150 °C + 5% Cc, 0.1 MPa	5	52.164	0.87687	16.8456	5.95297		3.98489	9.89889	2.95213	3.90694	0.847641	97.43	2.57	0.587623	0.558421
#2-3	1150 °C + 10% Cc, 0.1 MPa	10	50.8941	0.908134	16.7425	5.45847		3.42965	11.0039	3.20745	4.10593	0.850168	96.6003	3.39966	0.657242	0.542753
#2-4	1150 °C + 19% Cc, 0.1 MPa	19	48.151	0.747054	16.0374	4.62785		2.54192	16.6874	3.25987	4.14275	0.82467	97.02	2.98	1.04053	0.509241
#6-1	1050 °C + 0% Cc + 2% H2O 211 MPa	0	51.4287	0.814842	17.402	5.24496		4.19597	7.55836	3.15634	2.96902	0.88977	93.66	6.34	0.434338	0.601806
#6-2	1050 °C + 5% Cc + 2% H2O 211 MPa	5	52.3585	0.780476	19.274	4.31165		2.63649	6.24381	3.87383	4.67334	1.02794	95.18	4.82	0.323951	0.536004
#6-3	1050 °C + 9% Cc + 2% H2O 211 MPa	9	52.4047	0.65989	18.5995	4.44954		2.0268	5.47709	4.24215	5.68448	0.725879	94.27	5.73	0.294475	0.46252
#6-4	1050 °C + 16% Cc + 2% H2O 211 MPa	16	47.732	0.331275	19.9806	3.2465		1.27778	9.42714	5.77365	6.2469	0.634155	94.65	5.35	0.471814	0.426458
Carter and Dasgupta, 2015 (EPSL, 427, 202-214)
Starting composition (as in the original table)			49.89	0.78	18.71	10.14	0.21	6.24	11.43	2.08	0.52				0.610903	0.537587
Starting composition (not normalized to 100%)		0	47.8794	0.748566	17.956	9.73136	0.201537	5.98853	10.9694	1.99618	0.499044			4.03	0.610903	0.537587
B267	1100 °C + 50% Cc + 4% H2O, 5 kb	50	31.755	0.648945	12.1136	6.6625	0.250925	2.75153	29.8515	2.11989	0.346104		86.5	13.5	2.46429	0.438267
B295	1125 °C + 50% Cc + 4% H2O, 5 kb	50	33.3997	0.423122	7.29211	3.87112	0.153044	2.32267	40.5117	1.71049	0.216062		89.9	10.1	5.55556	0.531288
B298	1150 °C + 50% Cc + 4% H2O, 5 kb	50	29.6581	0.391383	5.91423	3.39199	0.121764	2.17435	43.6609	1.15675	0.130461		86.6	13.4	7.38235	0.547718
B280	1175 °C + 50% Cc + 4% H2O, 5 kb	50	29.5064	0.458989	9.91744	3.53258	0.139336	3.52438	33.6045	1.22943	0.286868		82.2	17.8	3.38843	0.653354
B279	1200 °C + 50% Cc + 4% H2O, 5 kb	50	28.04	0.465994	8.19506	2.32997	0.12855	4.74028	35.1102	1.12481	0.265134		80.4	19.6	4.28431	0.793537
Jolis et al., 2013 (Contrib. Mineral. Petrol., 166, 1335-1353)
Starting composition (Vesuvius shoshonite + 2 wt% H2O)		0	49.85	1.03	15.95	7.98	0.14	6.03	9.98	2.35	4.01	0.7		2	0.625705	0.588059
PC441-V1 (#6)	1200 °C + 22 wt% limestone + 2% H2O, 5 kb	22	28.718	0.513	9.069	5.072	0.12	4.49	35.289	1.164	1.281	0.365	86.081	13.919	3.89117	0.625804
PC441-V1 (#7)	1200 °C + 22 wt% limestone + 2% H2O, 5 kb	22	22.794	0.554	6.92	4.593	0.072	4.154	37.807	1.021	1.164	0.375	79.454	20.546	5.46344	0.630807
PC441-V1 (#8)	1200 °C + 22 wt% limestone + 2% H2O, 5 kb	22	26.013	0.645	8.328	5.364	0.103	4.655	35.308	1.256	1.306	0.411	83.389	16.611	4.23967	0.621136
PC441-V1 (#9)	1200 °C + 22 wt% limestone + 2% H2O, 5 kb	22	21.036	0.552	6.152	4.212	0.062	4.038	38.511	0.949	1.097	0.378	76.987	23.013	6.25992	0.644271
PC441-V1 (#10)	1200 °C + 22 wt% limestone + 2% H2O, 5 kb	22	28.314	0.598	8.896	5.055	0.12	4.399	34.071	1.008	1.201	0.352	84.014	15.986	3.82992	0.621787
PC448-V9 (#9)	1200 °C + 18 wt% limestone + 2% H2O, 5 kb	18	27.988	0.557	9.421	4.811	0.155	4.18	32.334	1.038	1.399	0.4	82.283	17.717	3.43212	0.621412
PC448-V9 (#10)	1200 °C + 18 wt% limestone + 2% H2O, 5 kb	18	26.999	0.665	9.051	4.832	0.092	4.207	33.399	1.056	1.393	0.419	82.113	17.887	3.69009	0.621902
PC448-V9 (#11)	1200 °C + 18 wt% limestone + 2% H2O, 5 kb	18	26.336	0.592	8.714	4.736	0.065	3.937	33.945	1.027	1.344	0.475	81.171	18.829	3.89546	0.610964
PC448-V9 (#12)	1200 °C + 18 wt% limestone + 2% H2O, 5 kb	18	24.302	0.521	7.618	4.489	0.08	4.082	35.552	1.181	1.467	0.429	79.721	20.279	4.66684	0.632068
PC448-V9 (#13)	1200 °C + 18 wt% limestone + 2% H2O, 5 kb	18	24.766	0.663	7.932	4.485	0.125	3.965	34.989	1.101	1.447	0.384	79.857	20.143	4.41112	0.625488
PC448-V9 (#14)	1200 °C + 18 wt% limestone + 2% H2O, 5 kb	18	25.654	0.449	8.702	4.577	0.072	3.959	33.671	1.119	1.369	0.454	80.026	19.974	3.86934	0.620363
PC448-V9 (#15)	1200 °C + 18 wt% limestone + 2% H2O, 5 kb	18	25.796	0.655	8.554	4.757	0.129	3.919	33.671	1.041	1.398	0.416	80.336	19.664	3.93629	0.608821
PC448-V9 (#16)	1200 °C + 18 wt% limestone + 2% H2O, 5 kb	18	25.825	0.459	8.366	4.581	0.107	3.914	33.554	1.171	1.4	0.494	79.871	20.129	4.01076	0.61746
PC448-V9 (#17)	1200 °C + 18 wt% limestone + 2% H2O, 5 kb	18	26.554	0.569	8.31	4.632	0.076	3.905	33.652	1.089	1.414	0.466	80.667	19.333	4.04958	0.614297
PC448-V9 (#18)	1200 °C + 18 wt% limestone + 2% H2O, 5 kb	18	27.332	0.61	8.487	4.655	0.07	4.032	33.133	1.062	1.41	0.443	81.234	18.766	3.90397	0.620686
Deegan et al., 2010 (J. Petrol., 51, 1027-1051)
Starting composition (Merapi basaltic andesite + 2 wt% H2O)		0	51.83	0.89	18.08	8.17	0.2	2.97	9.19	3.48	2.05	0.34		2	0.508296	0.407148
379-17	1200 °C + ~20% limestone + 2% H2O, 5 kb	20	34.11	0.45	12.27	5.35	0.11	2.41	31.16	1.35	0.73	0.22	88.16	11.84	2.53953	0.459755
376-11	1125 °C + 50% Cc + 4% H2O, 5 kb	20	27.72	0.49	10.35	4.85	0.18	2.18	34.34	1.33	0.65	0.16	82.25	17.75	3.31787	0.459212
386-19	1150 °C + 50% Cc + 4% H2O, 5 kb	20	34.9	0.56	12.23	5.38	0.13	2.3	31.08	1.75	0.79	0.24	89.36	10.64	2.54129	0.446792
374-5	1150 °C + 50% Cc + 4% H2O, 5 kb	20	38.08	0.58	13.93	5.48	0.14	2.26	27.39	2.22	1.21	0.22	91.51	8.49	1.96626	0.437922
PC443-V5	1200 °C + 50% Cc + 4% H2O, 5 kb (AVERAGE)	20	33.7025	0.52	12.195	5.265	0.14	2.2875	30.9925	1.6625	0.845	0.21	87.82	12.18	2.54141	0.450789
Di Stefano et al., 2018 (Lithos, 316-317, 104-121)
MM1-A	Synthetic composition Mg# 72; 1250 °C, 1 atm)	0	51.64	1.68047	14.4925	8.33401	0.155	7.71044	11.223	2.86	1.475	0.2	99.7704	0.229582	0.774401	0.636076
MM1-C	Synthetic composition Mg# 72; 1250 °C, 1 atm)	10	47.93	1.57372	13.48	8.22489	0.098	7.56582	16.18	2.98	1.56	0.19	99.7824	0.21757	1.2003	0.634742
MM1-D	Synthetic composition Mg# 72; 1250 °C, 1 atm)	20	43.57	1.47	12.48	7.62214	0.09	7.47542	22.05	3.15	1.68	0.18	99.7676	0.232433	1.76683	0.649468
MM2-A	Synthetic composition Mg# 72; 1200 °C, 1 atm)	0	51.87	1.72	15.08	7.92599	0.172	6.94211	11.26	2.98	1.53	0.22	99.7001	0.299902	0.746684	0.623305
MM2-C	Synthetic composition Mg# 72; 1200 °C, 1 atm)	10	48.02	1.64	14.25	7.735	0.123	6.92403	16.11	3.09	1.67	0.2	99.762	0.237968	1.13053	0.628406
MM2-D	Synthetic composition Mg# 72; 1200 °C, 1 atm)	20	43.94	1.51442	13.09	7.0405	0.122	6.87884	22	3.21	1.79	0.19	99.7758	0.22424	1.68067	0.648604
MM3-A	Synthetic composition Mg# 72; 1150 °C, 1 atm)	0	52.33	1.85	15.57	7.56137	0.166	5.97492	11.12	3.18	1.76	0.23	99.7423	0.25771	0.714194	0.598846
MM3-C	Synthetic composition Mg# 72; 1150 °C, 1 atm)	10	47.79	1.76	15.2452	7.48324	0.145	5.89356	16.09	3.25	1.85	0.22	99.727	0.273008	1.05542	0.598047
MM3-D	Synthetic composition Mg# 72; 1150 °C, 1 atm)	20	44.04	1.64	13.92	6.78006	0.132	5.80317	21.91	3.36	1.98	0.2	99.7652	0.234768	1.57399	0.61788
MM4-A	Synthetic composition Mg# 75; 1250 °C, 1 atm)	0	52.06	1.7	14.5654	7.38775	0.1799	8.26184	11.3	2.67847	1.37298	0.23	99.7363	0.263691	0.775813	0.678735
MM4-C	Synthetic composition Mg# 75; 1250 °C, 1 atm)	10	48.24	1.63	13.5489	7.37039	0.1372	8.09009	16.318	2.76509	1.47335	0.21	99.783	0.216993	1.20438	0.674654
MM4-D	Synthetic composition Mg# 75; 1250 °C, 1 atm)	20	43.64	1.52	12.88	6.945	0.12	7.87315	22.15	2.88023	1.56499	0.19	99.7634	0.236626	1.71972	0.681696
MM5-A	Synthetic composition Mg# 75; 1200 °C, 1 atm)	0	52.04	1.77	15.2867	7.25753	0.215	7.38503	11.32	2.79529	1.42903	0.25	99.7486	0.251408	0.740513	0.657811
MM5-C	Synthetic composition Mg# 75; 1200 °C, 1 atm)	10	48.22	1.69	14.303	7.01445	0.155	7.33984	16.4	2.89231	1.55022	0.23	99.7948	0.205179	1.14661	0.66407
MM5-D	Synthetic composition Mg# 75; 1200 °C, 1 atm)	20	43.81	1.59	13.0022	6.79742	0.158	7.24041	22.23	3.03934	1.67207	0.22	99.7595	0.240524	1.70971	0.668027
MM6-A	Synthetic composition Mg# 75; 1150 °C, 1 atm)	0	52.63	1.86	15.6654	6.84951	0.232	6.24609	11.34	2.95979	1.66804	0.26	99.7108	0.289167	0.723888	0.632724
MM6-C	Synthetic composition Mg# 75; 1150 °C, 1 atm)	10	48.44	1.78	15.2636	6.63248	0.18	6.19186	16.17	3.09842	1.74559	0.23	99.732	0.268016	1.05938	0.638162
MM6-D	Synthetic composition Mg# 75; 1150 °C, 1 atm)	20	44.23	1.65	13.9147	6.45017	0.154	6.10147	21.96	3.20047	1.84697	0.21	99.7178	0.282222	1.57819	0.641197
MM7-A	Synthetic composition Mg# 78; 1250 °C, 1 atm)	0	51.57	1.73	14.63	7.1794	0.19	8.8765	11.53	2.5175	1.2825	0.27	99.7759	0.2241	0.788107	0.700217
MM7-C	Synthetic composition Mg# 78; 1250 °C, 1 atm)	10	48.33	1.67	13.61	6.78	0.17	8.56917	16.41	2.5745	1.3965	0.24	99.7502	0.249831	1.20573	0.704815
MM7-D	Synthetic composition Mg# 78; 1250 °C, 1 atm)	20	43.65	1.59	13	6.47	0.155	8.32511	22.23	2.641	1.463	0.23	99.7541	0.245889	1.71	0.708527
MM8-A	Synthetic composition Mg# 78; 1200 °C, 1 atm)	0	51.46	1.81	15.47	7.10995	0.25	7.70141	11.634	2.6315	1.3395	0.3	99.7064	0.293647	0.752036	0.671736
MM8-C	Synthetic composition Mg# 78; 1200 °C, 1 atm)	10	47.98	1.71	14.35	6.91896	0.2	7.62909	16.54	2.717	1.444	0.28	99.7691	0.230948	1.15261	0.675648
MM8-D	Synthetic composition Mg# 78; 1200 °C, 1 atm)	20	43.67	1.62	12.9244	6.78006	0.185	7.52966	22.37	2.888	1.5675	0.25	99.7846	0.215379	1.73083	0.677215
MM9-A	Synthetic composition Mg# 78; 1150 °C, 1 atm)	0	52.19	1.88	15.75	6.81479	0.26	6.50823	11.65	2.7645	1.5865	0.31	99.714	0.285985	0.739683	0.643391
MM9-C	Synthetic composition Mg# 78; 1150 °C, 1 atm)	10	47.97	1.8	15.28	6.58907	0.215	6.43592	16.58	2.964	1.653	0.24	99.727	0.273011	1.08508	0.648539
MM9-D	Synthetic composition Mg# 78; 1150 °C, 1 atm)	20	44.16	1.74	13.91	6.22446	0.18	6.4088	22.17	3.059	1.729	0.22	99.8013	0.198741	1.59382	0.660456
																	Values uded for the plots
																	Values uded for the plots
																	Values uded for the plots

## Sheet: Data for olivine plots
Run#	Sample	P(kbar)	T(°C)	Cc added (wt%)	h	Phase	Fo	CaO
	BM1	Natural Olivine (average values)					79.1982	0.836429
QP1_125_10	BM1	2	1200	10	6	Olivine	95.5284	1.08075
QP1_125_30	BM1	2	1200	30	6	Olivine	95.7692	1.64267
QP1_125_50	BM1	2	1200	50	6	Olivine	95.8014	1.9515
QP1_124_10	BM1	2	1300	10	1	Olivine	95.8499	1.55867
QP1_124_30	BM1	2	1300	30	1	Olivine	96.9823	2.2136
	BM2	Natural Olivine (average values)					84.7133	0.224286
RM40_10	BM2	2	1200	10	1	Olivine	95.4288	2.72
RM41_30	BM2	2	1200	30	6	Olivine	96.1056	2.29412
RM41_50	BM2	2	1200	50	6	Olivine	95.2982	2.26
RM37_10	BM2	2	1300	10	1	Olivine	96.4204	2.45111
RM37_30	BM2	2	1300	30	1	Olivine	97.1408	2.274
RM37_50	BM2	2	1300	50	1	Olivine	96.0885	2.835
	BM3	Natural Olivine (average values)					82.6116	0.278118
RM43_10	BM3	2	1200	10	6	Olivine	96.1925	1.7028
RM43_30	BM3	2	1200	30	6	Olivine	94.9357	0.698507
RM43_50	BM3	2	1200	50	6	Olivine
RM42_10	BM3	2	1300	10	1	Olivine	95.1708	0.6746
RM42_30	BM3	2	1300	30	1	Olivine	95.1885	2.45833
Mollo et al., 2010 (Lithos, 114, 503-514)
2	+1 wt% H2O	5	1200	0		Olivine	96.25	0.4
6	+1 wt% H2O	5	1200	5		Olivine	93.47	0.58
15	+1 wt% H2O	5	1200	10		Olivine	91.25	0.79
5	+1 wt% H2O	5	1200	20		Olivine	89.14	1.09
9	+1 wt% H2O	5	1150	0		Olivine	89.14	0.58
8	+1 wt% H2O	5	1150	5		Olivine	88.79	0.7
12	+1 wt% H2O	5	1150	10		OLIVINE	87.68	0.86
7	+1 wt% H2O	5	1150	20		Olivine	87.47	1.1
Di Stefano et al., 2018 (Lithos, 316-317, 104-121)
MM9-A		1 atm	1150	0		Olivine	88.95	2.14
MM9-C		1 atm	1150	10		Olivine	90.018	2.21
MM9-D		1 atm	1150	20		Olivine	90.824	2.33
MM7-A		1 atm	1250	0		Olivine	90.183	1.59
MM7-C		1 atm	1250	10		Olivine	91.54	1.7
MM7-D		1 atm	1250	20		Olivine	92.559	1.78
Iacono Marziano et al., 2008 (Contrib. Mineral. Petrol., 155, 719-738)
#7-1	+6% ol + 1 wt% H2O	2.3	1100	0		Olivine	89.33	0.13
#7-2	+6% ol + 1 wt% H2O	2.3	1100	9		Olivine	88.21	0.31
#7-3	+7% ol + 1 wt% H2O	2.3	1100	15		Olivine	90.54	0.25
#8-1	+6% ol + 1 wt% H2O	2.1	1150	0		Olivine	90.183	0.24
#8-2	+7% ol + 1 wt% H2O	2.1	1150	8		Olivine	90.33	0.28
#8-4	+6% ol + 1 wt% H2O	2.1	1150	0		Olivine	90	0.24	Only these used for the plot (to avoid too many lines)
#8-5	+7% ol + 1 wt% H2O	2.1	1150	9		Olivine	90.53	0.23	Only these used for the plot (to avoid too many lines)
#8-6	+7% ol + 1 wt% H2O	2.1	1150	17		Olivine	91.08	0.23	Only these used for the plot (to avoid too many lines)
#7-4	+11% ol + 1 wt% H2O	2.1	1100	0		Olivine	90	0.24
#7-5	+12% ol + 1 wt% H2O	2.1	1100	9		Olivine	90.53	0.23
#7-6	+10% ol + 1 wt% H2O	2.1	1100	16		Olivine	91.08	0.23

## Sheet: Synopsis
Experiment	Sample	T (°C)	% added Cc	length (h)
QP1_123_10	BM1	1100	10	1
QP1_123_30	BM1	1100	30	1
QP1_123_50	BM1	1100	50	1
QP1_125_10	BM1	1200	10	6
QP1_122_30	BM1	1200	30	1
QP1_125_30	BM1	1200	30	6
QP1_125_50	BM1	1200	50	6
QP1_122_50	BM1	1200	50	1
QP1_124_10	BM1	1300	10	1
QP1_124_30	BM1	1300	30	1
QP1_124_50	BM1	1300	50	1
RM39_10	BM2	1100	10	6		Missing experiment @ 1100 °C and 50% Cc
RM39_30	BM2	1100	30	6
RM40_10	BM2	1200	10	1
RM41_10	BM2	1200	10	6
RM40_30	BM2	1200	30	1
RM41_30	BM2	1200	30	6
RM40_50	BM2	1200	50	1
RM41_50	BM2	1200	50	6
RM37_10	BM2	1300	10	1
RM37_30	BM2	1300	30	1
RM37_50	BM2	1300	50	1
RM44_10	BM3	1100	10	12		Missing experiments @ 1200 °C
RM44_30	BM3	1100	30	12
RM44_50	BM3	1100	50	12
RM45_10	BM3	1300	10	4
RM45_30	BM3	1300	30	4
RM45_50	BM3	1300	50	4

## Sheet: G49621
Lustrino, M., et al., 2022, Experimental evidence on the origin of Ca-rich carbonated melts formed by interaction between sedimentary limestones and mantle-derived ultrabasic magmas: Geology, https://doi.org/10.1130/G49621.1
